# Supplementary material for: Reactivity of a rhenium hydroxo–carbonyl complex toward carbon disulfide: insights from theory
Source: Royal Society of Chemistry journal article supplement (doi:10.1039/b915766b), 2009-11-20
Supplement: b915766b.pdf [file b915766b.pdf]

*Electronic Supplementary Information*

Reactivity of a Rhenium Hydroxo-Carbonyl  
Complex toward Carbon Disulfide: Insights  
from Theory

Violeta Yeguas,<sup>a</sup> Pablo Campomanes,<sup>b</sup> and Ramón López\*<sup>a</sup>

<sup>a</sup>Departamento de Química Física y Analítica, Universidad de Oviedo, C/Julián Clavería, 8, 33006 Oviedo, Spain.

<sup>b</sup>Laboratory of Computational Chemistry and Biochemistry, École Polytechnique Fédérale de Lausanne (EPFL), CH-1015 Lausanne, Switzerland.

rlopez@uniovi.es

## Index

|                 |    |
|-----------------|----|
| Table 1S.....   | 3  |
| Table 2S.....   | 4  |
| Table 3S.....   | 5  |
| Table 4S.....   | 6  |
| Table 5S.....   | 7  |
| Table 6S.....   | 8  |
| Figure 1S. .... | 38 |
| Figure 2S.....  | 38 |

**Table 1S.** Electronic energy, enthalpy, entropy, Gibbs energy in gas-phase, and Gibbs energy of solvation of the most chemically significant structures located for the reaction  $[\text{Re}(\text{OH})(\text{CO})_3(\text{bipy})] + \text{CS}_2 \rightarrow [\text{Re}(\text{SH})(\text{CO})_3(\text{bipy})] + \text{OCS}$  at the B3LYP/6-31+G(d,p) (LANL2DZ + *f* for Re) level of theory.

| Species        | E (h)        | H (h)        | S<br>(cal/K mol) | G (h)        | $\Delta G_{\text{solv}}$<br>(kcal/mol) |
|----------------|--------------|--------------|------------------|--------------|----------------------------------------|
| Reactants      | -1824.991913 | -1824.761636 | 199.801          | -1824.856567 | -1.7                                   |
| <b>TS1</b>     | -1824.964370 | -1824.733403 | 164.804          | -1824.811707 | -0.1                                   |
| <b>M1</b>      | -1824.972496 | -1824.739568 | 163.845          | -1824.817416 | -2.2                                   |
| <b>TS2-A</b>   | -1824.964109 | -1824.732078 | 162.885          | -1824.809470 | -3.1                                   |
| <b>M2-A</b>    | -1825.003957 | -1824.770408 | 162.925          | -1824.847819 | -2.4                                   |
| <b>TS3-A1</b>  | -1824.996636 | -1824.763971 | 158.587          | -1824.839321 | -0.9                                   |
| <b>M3-A1</b>   | -1825.004132 | -1824.770496 | 161.626          | -1824.847290 | -1.7                                   |
| <b>TS4-A1a</b> | -1824.972463 | -1824.739893 | 160.737          | -1824.816265 | -2.5                                   |
| <b>M4-A1a</b>  | -1824.997783 | -1824.765240 | 157.607          | -1824.840124 | -1.2                                   |
| <b>TS5-A1a</b> | -1824.954019 | -1824.726531 | 162.357          | -1824.803672 | 0.2                                    |
| <b>TS4-A1b</b> | -1824.960882 | -1824.733333 | 161.819          | -1824.810219 | -1.7                                   |
| <b>M4-A1b</b>  | -1825.005662 | -1824.774960 | 165.288          | -1824.853494 | -2.5                                   |
| <b>TS5-A1b</b> | -1824.963905 | -1824.734709 | 162.357          | -1824.812040 | -3.7                                   |
| <b>TS3-A2</b>  | -1824.965325 | -1824.737754 | 162.084          | -1824.814765 | -0.8                                   |
| <b>M3-A2</b>   | -1825.014351 | -1824.783680 | 165.107          | -1824.862128 | -0.7                                   |
| <b>TS4-A2</b>  | -1825.003288 | -1824.773963 | 163.540          | -1824.851666 | -0.8                                   |
| <b>M4-A2</b>   | -1825.013852 | -1824.783144 | 164.464          | -1824.861286 | -0.5                                   |
| <b>TS5-A2</b>  | -1824.972547 | -1824.745600 | 163.367          | -1824.823221 | 0.8                                    |
| <b>TS2-B</b>   | -1824.951350 | -1824.724005 | 162.795          | -1824.801354 | -1.1                                   |
| <b>M2-B</b>    | -1825.001235 | -1824.770585 | 163.149          | -1824.848102 | -0.7                                   |
| <b>TS3-B1</b>  | -1824.983220 | -1824.753610 | 161.489          | -1824.830338 | -0.8                                   |
| <b>TS3-B2</b>  | -1824.988634 | -1824.759270 | 162.731          | -1824.836589 | -0.2                                   |
| <b>M3-B2</b>   | -1825.002221 | -1824.771448 | 163.684          | -1824.849220 | 0.1                                    |
| <b>TS4-B2a</b> | -1824.983167 | -1824.753457 | 161.358          | -1824.830124 | -0.4                                   |
| <b>TS4-B2b</b> | -1824.966378 | -1824.739281 | 162.520          | -1824.816500 | -0.4                                   |
| <b>M4-B2b</b>  | -1824.995793 | -1824.764996 | 169.454          | -1824.845509 | 0.3                                    |
| <b>TS5-B2b</b> | -1824.960299 | -1824.731180 | 163.425          | -1824.808828 | -2.8                                   |
| <b>TS4-B2c</b> | -1824.995161 | -1824.765393 | 160.623          | -1824.841710 | 1.0                                    |
| Products       | -1825.020761 | -1824.790598 | 197.793          | -1824.884577 | -1.2                                   |

**Table 2S.** Electronic energy (in hartree) of the most chemically significant structures located for the reaction  $[\text{Re}(\text{OH})(\text{CO})_3(\text{bipy})] + \text{CS}_2 \rightarrow [\text{Re}(\text{SH})(\text{CO})_3(\text{bipy})] + \text{OCS}$  at the levels of theory DFT/6-31+G(d,p)(LANL2DZ+f for Re)//B3LYP/6-31+G(d,p)(LANL2DZ+f for Re) (DFT = B3PW91, M05, TPSS, TPSSh).

| Species        | B3PW91       | M05          | TPSS         | TPSSh        |
|----------------|--------------|--------------|--------------|--------------|
| Reactants      | -1824.548149 | -1824.287547 | -1825.164336 | -1825.014673 |
| <b>TS1</b>     | -1824.528309 | -1824.265828 | -1825.147088 | -1824.997670 |
| <b>M1</b>      | -1824.539176 | -1824.276842 | -1825.151627 | -1825.005278 |
| <b>TS2-A</b>   | -1824.531653 | -1824.269964 | -1825.144165 | -1824.997148 |
| <b>M2-A</b>    | -1824.574220 | -1824.307817 | -1825.183568 | -1825.038178 |
| <b>TS3-A1</b>  | -1824.566997 | -1824.300914 | -1825.175984 | -1825.030814 |
| <b>M3-A1</b>   | -1824.574946 | -1824.308191 | -1825.184103 | -1825.038942 |
| <b>TS4-A1a</b> | -1824.542112 | -1824.279187 | -1825.153140 | -1825.006814 |
| <b>M4-A1a</b>  | -1824.568155 | -1824.301890 | -1825.177190 | -1825.031965 |
| <b>TS5-A1a</b> | -1824.525946 | -1824.261055 | -1825.139983 | -1824.991582 |
| <b>TS4-A1b</b> | -1824.533378 | -1824.266628 | -1825.146694 | -1824.998766 |
| <b>M4-A1b</b>  | -1824.575467 | -1824.310827 | -1825.187304 | -1825.040977 |
| <b>TS5-A1b</b> | -1824.532076 | -1824.270868 | -1825.146760 | -1824.998740 |
| <b>TS3-A2</b>  | -1824.537598 | -1824.271000 | -1825.150536 | -1825.002872 |
| <b>M3-A2</b>   | -1824.583821 | -1824.319038 | -1825.194798 | -1825.048984 |
| <b>TS4-A2</b>  | -1824.572626 | -1824.306820 | -1825.184069 | -1825.037888 |
| <b>M4-A2</b>   | -1824.583354 | -1824.318388 | -1825.194367 | -1825.048589 |
| <b>TS5-A2</b>  | -1824.544520 | -1824.280076 | -1825.158212 | -1825.009840 |
| <b>TS2-B</b>   | -1824.520278 | -1824.256611 | -1825.135082 | -1824.987014 |
| <b>M2-B</b>    | -1824.567861 | -1824.305313 | -1825.180154 | -1825.034165 |
| <b>TS3-B1</b>  | -1824.550802 | -1824.290246 | -1825.164114 | -1825.017099 |
| <b>TS3-B2</b>  | -1824.554920 | -1824.292010 | -1825.167523 | -1825.021270 |
| <b>M3-B2</b>   | -1824.568873 | -1824.306562 | -1825.181007 | -1825.035165 |
| <b>TS4-B2a</b> | -1824.550783 | -1824.290252 | -1825.163992 | -1825.017087 |
| <b>TS4-B2b</b> | -1824.535644 | -1824.273079 | -1825.149437 | -1825.001622 |
| <b>M4-B2b</b>  | -1824.561731 | -1824.300792 | -1825.173855 | -1825.027976 |
| <b>TS5-B2b</b> | -1824.526683 | -1824.268187 | -1825.141233 | -1824.993382 |
| <b>TS4-B2c</b> | -1824.561050 | -1824.300275 | -1825.172537 | -1825.026826 |
| Products       | -1824.582576 | -1824.320220 | -1825.195871 | -1825.048424 |

**Table 3S.** Electronic energy, Gibbs energy in gas phase, Gibbs energy of solvation, and relative electronic energy, Gibbs energy in gas phase, Gibbs energy of solvation, and Gibbs energy in solution at the B3LYP/6-31+G(d,p) (LANL2DZ + *f* for Re) theory level of the most chemically significant structures located for the reaction  $[\text{Re}(\text{OCH}_3)(\text{CO})_3(\text{bipy})] + \text{CS}_2 \rightarrow [\text{Re}(\text{SCH}_3)(\text{CO})_3(\text{bipy})] + \text{OCS}$ . Relative Gibbs energy in solution obtained from single-point TPSS, and TPSSh energy calculations on the gas-phase optimized geometries at the above-mentioned theory level are also included.

| Species                        | E (h)        | G (h)        | $\Delta G_{\text{solv}}$<br>(kcal/mol) | $\Delta E$<br>(kcal/mol) | $\Delta G$<br>(kcal/mol) | $\Delta\Delta G_{\text{solv}}$<br>(kcal/mol) | $\Delta G_{\text{sol}}^{\text{B3LYP}}$<br>(kcal/mol) | $\Delta G_{\text{sol}}^{\text{TPSS}}$<br>(kcal/mol) | $\Delta G_{\text{sol}}^{\text{TPSSh}}$<br>(kcal/mol) |
|--------------------------------|--------------|--------------|----------------------------------------|--------------------------|--------------------------|----------------------------------------------|------------------------------------------------------|-----------------------------------------------------|------------------------------------------------------|
| Reactants                      | -1864.284801 | -1864.123712 | 0.1                                    | 0.0                      | 0.0                      | 0.0                                          | 0.0                                                  | 0.0                                                 | 0.0                                                  |
| <b>TS1-OCH<sub>3</sub></b>     | -1864.259391 | -1864.080557 | 1.7                                    | 15.9                     | 27.1                     | 1.6                                          | 28.7                                                 | 26.1                                                | 25.7                                                 |
| <b>M1-OCH<sub>3</sub></b>      | -1864.265514 | -1864.083230 | -0.4                                   | 12.1                     | 25.4                     | -0.5                                         | 24.9                                                 | 24.1                                                | 22.1                                                 |
| <b>TS2-A-OCH<sub>3</sub></b>   | -1864.261989 | -1864.079390 | -1.9                                   | 14.3                     | 27.8                     | -2.0                                         | 25.8                                                 | 23.7                                                | 22.3                                                 |
| <b>M2-A-OCH<sub>3</sub></b>    | -1864.304400 | -1864.122454 | -1.0                                   | -12.3                    | 0.8                      | -1.1                                         | -0.3                                                 | -1.4                                                | -3.9                                                 |
| <b>TS3-A1-OCH<sub>3</sub></b>  | -1864.298979 | -1864.115416 | 0.3                                    | -8.9                     | 5.2                      | 0.2                                          | 5.4                                                  | 4.6                                                 | 2.0                                                  |
| <b>M3-A1-OCH<sub>3</sub></b>   | -1864.304709 | -1864.122431 | -0.9                                   | -12.5                    | 0.8                      | -1.0                                         | -0.2                                                 | -1.3                                                | -4.0                                                 |
| <b>TS4-A1a-OCH<sub>3</sub></b> | -1864.274015 | -1864.092059 | -1.6                                   | 6.8                      | 19.9                     | -1.7                                         | 18.2                                                 | 16.4                                                | 14.5                                                 |
| <b>M4-A1a-OCH<sub>3</sub></b>  | -1864.299193 | -1864.117458 | 0.6                                    | -9.0                     | 3.9                      | 0.5                                          | 4.4                                                  | 3.2                                                 | 0.7                                                  |
| <b>TS5-A1a-OCH<sub>3</sub></b> | -1864.217595 | -1864.039421 | 1.0                                    | 42.2                     | 52.9                     | 0.9                                          | 53.8                                                 | 47.5                                                | 48.7                                                 |
| <b>TS4-A1b-OCH<sub>3</sub></b> | -1864.228401 | -1864.050446 | -1.0                                   | 35.4                     | 46.0                     | -1.1                                         | 44.9                                                 | 38.9                                                | 39.8                                                 |
| <b>M4-A1b-OCH<sub>3</sub></b>  | -1864.324050 | -1864.145274 | -1.8                                   | -24.6                    | -13.5                    | -1.9                                         | -15.4                                                | -15.9                                               | -18.3                                                |
| <b>TS5-A1b-OCH<sub>3</sub></b> | -1864.284517 | -1864.104754 | -2.6                                   | 0.2                      | 11.9                     | -2.7                                         | 9.2                                                  | 7.7                                                 | 6.4                                                  |
| <b>TS3-A2-OCH<sub>3</sub></b>  | -1864.231816 | -1864.053629 | -0.3                                   | 33.2                     | 44.0                     | -0.4                                         | 43.6                                                 | 38.0                                                | 38.8                                                 |
| <b>M3-A2-OCH<sub>3</sub></b>   | -1864.332452 | -1864.153084 | -0.4                                   | -29.9                    | -18.4                    | -0.5                                         | -18.9                                                | -18.6                                               | -21.3                                                |
| <b>TS4-A2-OCH<sub>3</sub></b>  | -1864.319376 | -1864.138672 | -0.1                                   | -21.7                    | -9.4                     | -0.2                                         | -9.6                                                 | -9.4                                                | -11.9                                                |
| <b>M4-A2-OCH<sub>3</sub></b>   | -1864.329595 | -1864.149456 | -0.6                                   | -28.1                    | -16.2                    | -0.7                                         | -16.9                                                | -16.7                                               | -19.4                                                |
| <b>TS5-A2-OCH<sub>3</sub></b>  | -1864.228967 | -1864.051702 | 1.4                                    | 35.0                     | 45.2                     | 1.3                                          | 46.5                                                 | 41.1                                                | 42.2                                                 |
| <b>TS2-B-OCH<sub>3</sub></b>   | -1864.207225 | -1864.028518 | -1.5                                   | 48.7                     | 59.7                     | -1.6                                         | 58.1                                                 | 52.0                                                | 53.2                                                 |
| Products                       | -1864.325134 | -1864.164770 | -0.4                                   | -25.3                    | -25.8                    | -0.5                                         | -26.3                                                | -25.8                                               | -27.3                                                |

**Table 4S.** Electronic energy (in hartree) of the most chemically significant structures located for the reaction  $[\text{Re}(\text{OCH}_3)(\text{CO})_3(\text{bipy})] + \text{CS}_2 \rightarrow [\text{Re}(\text{SCH}_3)(\text{CO})_3(\text{bipy})] + \text{OCS}$  at the levels of theory DFT/6-31+G(d,p)(LANL2DZ+f for Re)//B3LYP/6-31+G(d,p)(LANL2DZ+f for Re) (DFT = TPSS, TPSSh).

| Species                        | TPSS         | TPSSh        |
|--------------------------------|--------------|--------------|
| Reactants                      | -1864.473625 | -1864.320122 |
| <b>TS1-OCH<sub>3</sub></b>     | -1864.452279 | -1864.299387 |
| <b>M1-OCH<sub>3</sub></b>      | -1864.455648 | -1864.305378 |
| <b>TS2-A-OCH<sub>3</sub></b>   | -1864.454136 | -1864.302879 |
| <b>M2-A-OCH<sub>3</sub></b>    | -1864.494906 | -1864.345414 |
| <b>TS3-A1-OCH<sub>3</sub></b>  | -1864.489047 | -1864.339785 |
| <b>M3-A1-OCH<sub>3</sub></b>   | -1864.495291 | -1864.346111 |
| <b>TS4-A1a-OCH<sub>3</sub></b> | -1864.465616 | -1864.315203 |
| <b>M4-A1a-OCH<sub>3</sub></b>  | -1864.489990 | -1864.340406 |
| <b>TS5-A1a-OCH<sub>3</sub></b> | -1864.416510 | -1864.261061 |
| <b>TS4-A1b-OCH<sub>3</sub></b> | -1864.426792 | -1864.271885 |
| <b>M4-A1b-OCH<sub>3</sub></b>  | -1864.513552 | -1864.363913 |
| <b>TS5-A1b-OCH<sub>3</sub></b> | -1864.475681 | -1864.324291 |
| <b>TS3-A2-OCH<sub>3</sub></b>  | -1864.429601 | -1864.274797 |
| <b>M3-A2-OCH<sub>3</sub></b>   | -1864.520721 | -1864.371582 |
| <b>TS4-A2-OCH<sub>3</sub></b>  | -1864.507831 | -1864.358348 |
| <b>M4-A2-OCH<sub>3</sub></b>   | -1864.518137 | -1864.368955 |
| <b>TS5-A2-OCH<sub>3</sub></b>  | -1864.426300 | -1864.271042 |
| <b>TS2-B-OCH<sub>3</sub></b>   | -1864.405826 | -1864.250393 |
| Products                       | -1864.513156 | -1864.362084 |

**Table 5S.** Imaginary vibrational frequencies corresponding to all the located transition states.

| <b>Species</b>                 | <b><math>\omega_i</math> (cm<sup>-1</sup>)</b> |
|--------------------------------|------------------------------------------------|
| <b>TS1</b>                     | 309                                            |
| <b>TS2-A</b>                   | 143                                            |
| <b>TS3-A1</b>                  | 47                                             |
| <b>TS4-A1a</b>                 | 150                                            |
| <b>TS5-A1a</b>                 | 1590                                           |
| <b>TS4-A1b</b>                 | 1688                                           |
| <b>TS5-A1b</b>                 | 165                                            |
| <b>TS3-A2</b>                  | 1695                                           |
| <b>TS4-A2</b>                  | 319                                            |
| <b>TS5-A2</b>                  | 1213                                           |
| <b>TS2-B</b>                   | 1564                                           |
| <b>TS3-B1</b>                  | 157                                            |
| <b>TS3-B2</b>                  | 340                                            |
| <b>TS4-B2a</b>                 | 158                                            |
| <b>TS4-B2b</b>                 | 1330                                           |
| <b>TS5-B2b</b>                 | 195                                            |
| <b>TS4-B2c</b>                 | 32                                             |
| <b>TS1-OCH<sub>3</sub></b>     | 284                                            |
| <b>TS2-A-OCH<sub>3</sub></b>   | 93                                             |
| <b>TS3-A1-OCH<sub>3</sub></b>  | 26                                             |
| <b>TS4-A1a-OCH<sub>3</sub></b> | 143                                            |
| <b>TS5-A1a-OCH<sub>3</sub></b> | 586                                            |
| <b>TS4-A1b-OCH<sub>3</sub></b> | 606                                            |
| <b>TS5-A1b-OCH<sub>3</sub></b> | 129                                            |
| <b>TS3-A2-OCH<sub>3</sub></b>  | 602                                            |
| <b>TS4-A2-OCH<sub>3</sub></b>  | 71                                             |
| <b>TS5-A2-OCH<sub>3</sub></b>  | 549                                            |
| <b>TS2-B-OCH<sub>3</sub></b>   | 580                                            |

**Table 6S.** Cartesian coordinates, in angstroms, corresponding to all the located structures.

| CS <sub>2</sub> |          |          |           |
|-----------------|----------|----------|-----------|
| S               | 0.000000 | 0.000000 | -0.293051 |
| C               | 0.000000 | 0.000000 | 1.270000  |
| S               | 0.000000 | 0.000000 | 2.833051  |

| [Re(OH)(CO) <sub>3</sub> (bipy)] |           |           |           |
|----------------------------------|-----------|-----------|-----------|
| C                                | -0.024620 | 0.111630  | -0.037442 |
| O                                | -0.048644 | 0.169373  | 1.126860  |
| Re                               | 0.093095  | 0.016576  | -1.946429 |
| C                                | -1.721920 | 0.613601  | -2.074012 |
| O                                | -2.818992 | 0.988820  | -2.197225 |
| C                                | -0.499807 | -1.821793 | -1.905308 |
| O                                | -0.846351 | -2.937712 | -1.891516 |
| N                                | 2.236326  | -0.507712 | -2.099550 |
| C                                | 2.805812  | -0.369167 | -3.322256 |
| C                                | 1.874614  | -0.094949 | -4.439353 |
| N                                | 0.562415  | -0.013843 | -4.107600 |
| O                                | 0.964465  | 1.890574  | -2.210300 |
| H                                | 0.566108  | 2.607222  | -1.705365 |
| C                                | -0.347301 | 0.189790  | -5.076000 |
| C                                | 3.014325  | -0.801110 | -1.043389 |
| C                                | -0.001954 | 0.326171  | -6.416673 |
| H                                | -1.380514 | 0.248116  | -4.754821 |
| H                                | -0.775951 | 0.491838  | -7.157860 |
| C                                | 1.345977  | 0.252678  | -6.768567 |
| C                                | 2.290609  | 0.035995  | -5.770090 |
| H                                | 1.658046  | 0.359838  | -7.802720 |
| H                                | 3.340559  | -0.027796 | -6.027169 |
| C                                | 4.391625  | -0.967731 | -1.146132 |
| H                                | 2.507701  | -0.898571 | -0.090544 |
| H                                | 4.973184  | -1.201329 | -0.261206 |
| C                                | 4.989465  | -0.819219 | -2.397798 |
| C                                | 4.187130  | -0.521392 | -3.494975 |
| H                                | 6.061856  | -0.935070 | -2.519853 |
| H                                | 4.635141  | -0.406840 | -4.474118 |

| [Re(SH)(CO) <sub>3</sub> (bipy)] |           |           |           |
|----------------------------------|-----------|-----------|-----------|
| C                                | 2.933926  | -2.085879 | -0.103654 |
| C                                | 1.818501  | -1.256212 | -0.275351 |
| N                                | 1.181912  | -0.707013 | 0.792176  |
| C                                | 1.628557  | -0.987673 | 2.031797  |
| C                                | 2.728710  | -1.803281 | 2.268928  |
| C                                | 3.397007  | -2.361950 | 1.178404  |
| C                                | 1.247948  | -0.924523 | -1.596517 |
| C                                | 1.768145  | -1.407397 | -2.804090 |
| C                                | 1.158830  | -1.060145 | -4.005126 |
| C                                | 0.032745  | -0.236181 | -3.973609 |
| C                                | -0.433838 | 0.210544  | -2.742947 |
| N                                | 0.158464  | -0.112668 | -1.576925 |
| Re                               | -0.592065 | 0.538335  | 0.390846  |
| C                                | -1.124203 | 0.846014  | 2.210384  |
| O                                | -1.419330 | 0.996589  | 3.325799  |
| C                                | -2.170316 | 1.452403  | -0.210884 |
| O                                | -3.122528 | 1.983779  | -0.616933 |
| C                                | 0.427196  | 2.174195  | 0.360233  |
| O                                | 1.038589  | 3.167727  | 0.344838  |



|   |           |           |           |
|---|-----------|-----------|-----------|
| S | -1.792342 | -1.697673 | 0.349914  |
| H | -2.962720 | -1.376992 | 0.934688  |
| H | 1.075819  | -0.541176 | 2.848873  |
| H | 3.044225  | -1.994558 | 3.288565  |
| H | 4.259270  | -3.005109 | 1.322795  |
| H | 3.433266  | -2.517610 | -0.962095 |
| H | -1.309155 | 0.844032  | -2.672178 |
| H | -0.483985 | 0.056228  | -4.880959 |
| H | 1.552593  | -1.430333 | -4.946354 |
| H | 2.637298  | -2.053320 | -2.807208 |

### COS

|   |           |          |          |
|---|-----------|----------|----------|
| S | -0.001063 | 0.000000 | 0.016567 |
| C | 0.003027  | 0.000000 | 1.588511 |
| O | 0.019329  | 0.000000 | 2.754735 |

### TS1

|    |           |           |           |
|----|-----------|-----------|-----------|
| C  | 1.119578  | -2.173229 | -3.524340 |
| C  | 0.640608  | -1.747492 | -2.279465 |
| N  | -0.125612 | -0.630495 | -2.173193 |
| C  | -0.437022 | 0.059533  | -3.286981 |
| C  | 0.003519  | -0.313632 | -4.552019 |
| C  | 0.804311  | -1.449902 | -4.670554 |
| Re | -0.637620 | 0.012351  | -0.130227 |
| C  | -2.409451 | -0.717797 | -0.215097 |
| O  | -3.480894 | -1.170502 | -0.290811 |
| C  | 0.890024  | -2.481711 | -1.019552 |
| N  | 0.324368  | -1.951562 | 0.095237  |
| C  | 0.465492  | -2.592398 | 1.269667  |
| C  | 1.166844  | -3.787496 | 1.393695  |
| C  | 1.765282  | -4.331389 | 0.259003  |
| C  | 1.623194  | -3.671913 | -0.959122 |
| C  | -0.911753 | 0.417744  | 1.739439  |
| O  | -1.122601 | 0.631822  | 2.859844  |
| O  | 1.424074  | 0.628008  | -0.220661 |
| C  | -1.328544 | 1.749736  | -0.569039 |
| O  | -1.740152 | 2.792686  | -0.881468 |
| C  | 2.812035  | 0.924457  | 1.031454  |
| S  | 3.786150  | 1.998757  | 0.314188  |
| S  | 2.535454  | 0.002820  | 2.326071  |
| H  | 1.606421  | 1.377248  | -0.805570 |
| H  | 0.004028  | -2.122972 | 2.128709  |
| H  | 1.250922  | -4.261158 | 2.365214  |
| H  | 2.333903  | -5.254035 | 0.317498  |
| H  | 2.079312  | -4.083912 | -1.850396 |
| H  | -1.055579 | 0.937945  | -3.145641 |
| H  | -0.274734 | 0.280368  | -5.415384 |
| H  | 1.175240  | -1.770964 | -5.638723 |
| H  | 1.734614  | -3.060944 | -3.600703 |

### M1

|    |           |           |           |
|----|-----------|-----------|-----------|
| C  | -1.095324 | 0.368926  | 1.752910  |
| O  | -1.400437 | 0.545577  | 2.854714  |
| Re | -0.706822 | 0.017470  | -0.117386 |
| N  | -0.051350 | -0.537786 | -2.142376 |
| C  | 0.736256  | -1.642090 | -2.253559 |
| C  | 0.993447  | -2.379020 | -0.998406 |
| N  | 0.404609  | -1.869344 | 0.115187  |
| O  | 1.338365  | 0.959531  | -0.115419 |
| C  | 2.540128  | 0.616269  | 0.646009  |

|   |           |           |           |
|---|-----------|-----------|-----------|
| S | 2.251520  | 0.247036  | 2.243023  |
| C | -1.529485 | 1.698165  | -0.562108 |
| O | -2.020416 | 2.703717  | -0.877092 |
| C | -2.389920 | -0.849114 | -0.284169 |
| O | -3.412303 | -1.393783 | -0.404752 |
| S | 3.918274  | 0.706147  | -0.306826 |
| H | 1.690893  | 1.236869  | -0.983493 |
| C | -0.356474 | 0.163542  | -3.254328 |
| C | 1.238518  | -2.042351 | -3.497698 |
| C | 1.772239  | -3.539368 | -0.937470 |
| C | 0.576293  | -2.499636 | 1.292759  |
| C | 1.939127  | -4.190599 | 0.281595  |
| H | 2.252862  | -3.927874 | -1.826151 |
| H | 2.546076  | -5.088247 | 0.342282  |
| C | 1.323307  | -3.667070 | 1.416197  |
| H | 0.105010  | -2.042641 | 2.151922  |
| H | 1.429956  | -4.132847 | 2.389093  |
| C | 0.928606  | -1.308653 | -4.637874 |
| H | 1.871235  | -2.917129 | -3.575910 |
| H | 1.318947  | -1.609934 | -5.604641 |
| C | 0.109856  | -0.184891 | -4.515886 |
| H | -0.994639 | 1.027475  | -3.112046 |
| H | -0.163967 | 0.417086  | -5.375013 |

### TS2-A

|    |           |           |           |
|----|-----------|-----------|-----------|
| C  | 0.480911  | 0.727697  | 1.026240  |
| O  | 0.611805  | 0.715296  | -0.134255 |
| Re | 0.294285  | 0.758818  | 2.894321  |
| N  | 2.126479  | 1.964870  | 3.170404  |
| C  | 1.981472  | 3.311682  | 3.266521  |
| C  | 0.607404  | 3.819743  | 3.085309  |
| N  | -0.348598 | 2.872916  | 2.892452  |
| C  | -1.446413 | -0.042459 | 2.732349  |
| O  | -2.520111 | -0.473688 | 2.623926  |
| C  | 1.071921  | -1.010685 | 2.996813  |
| O  | 1.562221  | -2.060133 | 2.992970  |
| O  | -0.613313 | 1.326908  | 5.248694  |
| C  | 0.234122  | 1.041494  | 6.329726  |
| S  | -0.183624 | 1.689282  | 7.809604  |
| S  | 1.527872  | 0.071050  | 5.831220  |
| C  | -1.624821 | 3.265789  | 2.698802  |
| C  | 0.282642  | 5.182899  | 3.089276  |
| C  | 3.082507  | 4.142465  | 3.512376  |
| C  | 3.358107  | 1.431779  | 3.293294  |
| H  | -1.353264 | 1.859553  | 5.597271  |
| C  | -2.011318 | 4.599946  | 2.697834  |
| H  | -2.348155 | 2.474538  | 2.540783  |
| H  | -3.053138 | 4.857069  | 2.542183  |
| C  | -1.036212 | 5.579457  | 2.898997  |
| H  | 1.053300  | 5.928433  | 3.239033  |
| H  | -1.297644 | 6.632722  | 2.904523  |
| C  | 4.350441  | 3.585098  | 3.635077  |
| H  | 2.951526  | 5.212488  | 3.612642  |
| H  | 5.210428  | 4.218574  | 3.827289  |
| C  | 4.493035  | 2.202318  | 3.511467  |
| H  | 3.419529  | 0.353568  | 3.223811  |
| H  | 5.459463  | 1.719066  | 3.599409  |

### M2-A

|    |           |           |          |
|----|-----------|-----------|----------|
| O  | 0.000000  | 0.000000  | 0.000000 |
| C  | 0.000000  | 0.000000  | 1.164531 |
| Re | 0.001445  | 0.000000  | 3.089830 |
| N  | -1.349988 | -1.729870 | 3.209734 |
| C  | -0.943555 | -3.012580 | 3.142971 |
| H  | 0.117111  | -3.168968 | 2.996086 |
| C  | -1.818471 | -4.086087 | 3.264621 |
| H  | -1.435476 | -5.098726 | 3.204499 |
| C  | -3.173273 | -3.827006 | 3.471969 |
| H  | -3.885903 | -4.638383 | 3.580108 |
| C  | -3.600474 | -2.504555 | 3.537746 |
| H  | -4.648813 | -2.284571 | 3.695047 |
| C  | -2.670644 | -1.467103 | 3.400823 |
| C  | -3.042680 | -0.037967 | 3.424484 |
| C  | -4.355398 | 0.412555  | 3.610043 |
| H  | -5.159704 | -0.294505 | 3.769257 |
| C  | -4.626264 | 1.776898  | 3.598492 |
| H  | -5.639839 | 2.135058  | 3.747539 |
| C  | -3.573761 | 2.669851  | 3.394522 |
| H  | -3.731438 | 3.742455  | 3.377593 |
| C  | -2.292601 | 2.160956  | 3.217212 |
| H  | -1.446229 | 2.818964  | 3.062537 |
| N  | -2.022550 | 0.840343  | 3.231015 |
| C  | 0.975301  | 1.660271  | 3.110460 |
| O  | 1.525134  | 2.684298  | 3.123836 |
| C  | 1.684417  | -0.946550 | 3.103411 |
| O  | 2.686341  | -1.531061 | 3.082398 |
| S  | -0.217722 | 0.119889  | 5.638440 |
| C  | 0.311857  | -1.326169 | 6.428379 |
| S  | 0.208424  | -1.598360 | 8.069166 |
| O  | 0.843916  | -2.274111 | 5.609982 |
| H  | 1.138511  | -2.994877 | 6.195175 |

### TS3-A1

|    |           |           |          |
|----|-----------|-----------|----------|
| O  | -0.021820 | -0.040478 | 0.017670 |
| C  | -0.037375 | -0.064808 | 1.182706 |
| Re | -0.067126 | -0.099913 | 3.099653 |
| N  | -1.477066 | -1.779973 | 3.185313 |
| C  | -1.114261 | -3.074579 | 3.127453 |
| H  | -0.058624 | -3.271282 | 2.991623 |
| C  | -2.028991 | -4.118275 | 3.230437 |
| H  | -1.678370 | -5.142815 | 3.179451 |
| C  | -3.374058 | -3.812478 | 3.420276 |
| H  | -4.116743 | -4.598248 | 3.514604 |
| C  | -3.755032 | -2.474850 | 3.493042 |
| H  | -4.796472 | -2.219302 | 3.642570 |
| C  | -2.788283 | -1.471749 | 3.372400 |
| C  | -3.109069 | -0.030467 | 3.407684 |
| C  | -4.406402 | 0.465685  | 3.587169 |
| H  | -5.236523 | -0.213916 | 3.732401 |
| C  | -4.628533 | 1.838697  | 3.587365 |
| H  | -5.630389 | 2.230646  | 3.731108 |
| C  | -3.543876 | 2.696854  | 3.401665 |
| H  | -3.663730 | 3.774426  | 3.394110 |
| C  | -2.280296 | 2.144381  | 3.230031 |
| H  | -1.409228 | 2.772843  | 3.089726 |
| N  | -2.058022 | 0.814695  | 3.232266 |
| C  | 0.976204  | 1.518807  | 3.174475 |
| O  | 1.569497  | 2.515953  | 3.223542 |
| C  | 1.568521  | -1.118881 | 3.129854 |
| O  | 2.535982  | -1.761171 | 3.144412 |

|   |           |           |          |
|---|-----------|-----------|----------|
| S | -0.327727 | -0.030040 | 5.667055 |
| C | 0.606601  | -1.397200 | 6.261676 |
| S | 0.106403  | -2.982607 | 6.388524 |
| O | 1.831126  | -1.033639 | 6.688091 |
| H | 2.271355  | -1.836229 | 7.023555 |

### M3-A1

|    |           |           |          |
|----|-----------|-----------|----------|
| O  | 0.000000  | 0.000000  | 0.000000 |
| C  | 0.000000  | 0.000000  | 1.164560 |
| Re | 0.005201  | 0.000000  | 3.087051 |
| N  | 1.042051  | 1.937557  | 3.177114 |
| C  | 0.417371  | 3.128155  | 3.102153 |
| H  | -0.656646 | 3.097112  | 2.983311 |
| C  | 1.099468  | 4.339153  | 3.177637 |
| H  | 0.545223  | 5.268601  | 3.112875 |
| C  | 2.480992  | 4.320868  | 3.354441 |
| H  | 3.045858  | 5.244867  | 3.426909 |
| C  | 3.132384  | 3.092490  | 3.435296 |
| H  | 4.206500  | 3.059558  | 3.567614 |
| C  | 2.391538  | 1.909622  | 3.338909 |
| C  | 3.004412  | 0.565640  | 3.371177 |
| C  | 4.377763  | 0.349815  | 3.537959 |
| H  | 5.050135  | 1.187276  | 3.674823 |
| C  | 4.879504  | -0.947692 | 3.535576 |
| H  | 5.942130  | -1.123752 | 3.668926 |
| C  | 3.993543  | -2.011237 | 3.361184 |
| H  | 4.333311  | -3.040854 | 3.352736 |
| C  | 2.641044  | -1.732350 | 3.202551 |
| H  | 1.917803  | -2.527912 | 3.071165 |
| N  | 2.148544  | -0.477827 | 3.206071 |
| C  | -0.660720 | -1.804473 | 3.105266 |
| O  | -1.019560 | -2.910509 | 3.114853 |
| C  | -1.827555 | 0.623799  | 3.089641 |
| O  | -2.925923 | 0.988767  | 3.036729 |
| S  | 0.250763  | -0.124735 | 5.630719 |
| C  | -0.467929 | 1.193782  | 6.493233 |
| S  | -1.299649 | 2.538473  | 5.943532 |
| O  | -0.281450 | 1.027836  | 7.826172 |
| H  | -0.707111 | 1.787209  | 8.261409 |

### TS4-A1a

|    |           |           |           |
|----|-----------|-----------|-----------|
| C  | -2.462480 | -0.493340 | -0.155775 |
| O  | -3.611527 | -0.354533 | -0.322936 |
| Re | -0.614347 | -0.699396 | 0.108839  |
| N  | -0.164453 | 0.708777  | -1.553001 |
| C  | 0.009561  | 2.018105  | -1.244403 |
| C  | -0.172128 | 2.366920  | 0.179677  |
| N  | -0.471255 | 1.330879  | 1.002676  |
| C  | -0.961592 | -1.706973 | 1.712151  |
| O  | -1.209936 | -2.276927 | 2.692487  |
| C  | -0.660040 | -2.347364 | -0.889292 |
| O  | -0.728662 | -3.316081 | -1.524139 |
| S  | 2.295696  | -1.350342 | -1.018485 |
| C  | 2.913348  | -1.052961 | 0.525199  |
| O  | 4.250284  | -1.182301 | 0.680155  |
| S  | 1.980045  | -0.607744 | 1.880311  |
| C  | -0.063451 | 3.674258  | 0.671759  |
| C  | 0.329442  | 2.958832  | -2.232159 |
| H  | 4.463789  | -1.002181 | 1.610624  |
| C  | -0.273229 | 3.920536  | 2.024155  |

|   |           |           |           |
|---|-----------|-----------|-----------|
| H | 0.180458  | 4.492521  | 0.005967  |
| H | -0.191616 | 4.929276  | 2.416316  |
| C | -0.590713 | 2.849726  | 2.861165  |
| C | -0.675524 | 1.576823  | 2.311263  |
| H | -0.764617 | 2.988243  | 3.922380  |
| H | -0.905218 | 0.716343  | 2.927347  |
| C | 0.456982  | 2.550865  | -3.555434 |
| H | 0.480028  | 3.998934  | -1.971608 |
| H | 0.707395  | 3.270114  | -4.328713 |
| C | 0.258183  | 1.204926  | -3.866060 |
| C | -0.044486 | 0.321393  | -2.837659 |
| H | 0.345380  | 0.835775  | -4.881756 |
| H | -0.186006 | -0.734286 | -3.032476 |

#### M4-A1a

|    |           |           |           |
|----|-----------|-----------|-----------|
| C  | -1.724393 | 0.724998  | -1.859899 |
| O  | -2.144582 | 1.233553  | -2.818529 |
| Re | -1.032562 | -0.122358 | -0.278854 |
| N  | 0.959223  | -0.152164 | -1.199903 |
| C  | 1.798610  | 0.871009  | -0.898652 |
| C  | 1.272313  | 1.869990  | 0.052864  |
| N  | -0.015528 | 1.687642  | 0.447595  |
| S  | -0.301637 | -1.144133 | 1.960022  |
| C  | 1.270185  | -1.903123 | 2.130619  |
| O  | 1.441625  | -2.403898 | 3.380743  |
| C  | -2.724658 | 0.145887  | 0.603896  |
| O  | -3.736645 | 0.354000  | 1.136325  |
| C  | -1.640539 | -1.849257 | -0.886627 |
| O  | -1.971720 | -2.896747 | -1.259773 |
| S  | 2.517854  | -2.094500 | 1.053189  |
| C  | -0.564438 | 2.562344  | 1.312971  |
| C  | 3.070428  | 0.955846  | -1.473964 |
| H  | 0.630125  | -2.253466 | 3.896780  |
| C  | 0.129849  | 3.653488  | 1.822304  |
| H  | -1.590491 | 2.369279  | 1.601027  |
| H  | -0.362005 | 4.325739  | 2.516444  |
| C  | 1.454102  | 3.846418  | 1.428025  |
| C  | 2.027310  | 2.945224  | 0.536509  |
| H  | 2.033399  | 4.680595  | 1.810832  |
| H  | 3.057757  | 3.071421  | 0.229464  |
| C  | 3.488052  | -0.024182 | -2.368973 |
| H  | 3.730671  | 1.777895  | -1.227963 |
| H  | 4.473847  | 0.030570  | -2.819593 |
| C  | 2.621494  | -1.073666 | -2.667892 |
| C  | 1.373784  | -1.103479 | -2.056302 |
| H  | 2.902433  | -1.868465 | -3.349594 |
| H  | 0.679058  | -1.911210 | -2.247956 |

#### TS5-A1a

|    |           |           |           |
|----|-----------|-----------|-----------|
| C  | -0.075688 | 0.247067  | 2.631872  |
| Re | 0.161197  | 0.392965  | 0.729735  |
| C  | 1.941597  | -0.327780 | 0.879005  |
| O  | 2.999333  | -0.801329 | 0.959099  |
| O  | -0.217577 | 0.156104  | 3.782514  |
| N  | -0.903963 | -1.499522 | 0.370391  |
| C  | -2.252768 | -1.430202 | 0.213915  |
| C  | -2.835150 | -0.072979 | 0.262322  |
| N  | -1.949123 | 0.942677  | 0.432615  |
| S  | 0.518478  | 0.614102  | -1.810176 |
| C  | -0.753920 | -0.446968 | -2.737041 |

|   |           |           |           |
|---|-----------|-----------|-----------|
| S | -2.304120 | -0.043825 | -3.147333 |
| C | 0.872927  | 2.171930  | 0.938659  |
| O | 1.263072  | 3.259046  | 1.059329  |
| O | -0.056914 | -1.496557 | -2.970614 |
| C | -2.403270 | 2.211406  | 0.435262  |
| C | -3.014102 | -2.586218 | 0.010313  |
| H | 0.933795  | -0.809416 | -2.318797 |
| C | -3.748478 | 2.528222  | 0.294294  |
| H | -1.656427 | 2.986430  | 0.555363  |
| H | -4.057603 | 3.567388  | 0.297233  |
| C | -4.669075 | 1.489562  | 0.152562  |
| C | -4.205535 | 0.179415  | 0.137138  |
| H | -5.729000 | 1.696051  | 0.044565  |
| H | -4.902595 | -0.638172 | 0.006485  |
| C | -2.386171 | -3.825692 | -0.044631 |
| H | -4.085700 | -2.518382 | -0.125509 |
| H | -2.967921 | -4.726206 | -0.212673 |
| C | -1.000749 | -3.886055 | 0.103461  |
| C | -0.300814 | -2.703481 | 0.306549  |
| H | -0.462281 | -4.825669 | 0.054044  |
| H | 0.775991  | -2.705902 | 0.421163  |

#### TS4-A1b

|    |           |           |           |
|----|-----------|-----------|-----------|
| C  | -0.588458 | 3.656697  | 0.721746  |
| C  | -0.473729 | 2.350243  | 0.231527  |
| N  | -1.072473 | 1.309728  | 0.870107  |
| C  | -1.780994 | 1.551325  | 1.990842  |
| C  | -1.929012 | 2.824539  | 2.528577  |
| C  | -1.322900 | 3.899528  | 1.878024  |
| C  | 0.302813  | 2.001141  | -0.975973 |
| N  | 0.292501  | 0.686246  | -1.325331 |
| C  | 1.009336  | 0.290075  | -2.394284 |
| C  | 1.766479  | 1.170932  | -3.160400 |
| C  | 1.775403  | 2.520563  | -2.816565 |
| C  | 1.036174  | 2.937355  | -1.712157 |
| Re | -0.934759 | -0.661352 | -0.094055 |
| C  | -0.784578 | -2.273854 | -1.150094 |
| O  | -0.664290 | -3.249137 | -1.764788 |
| S  | -2.992817 | 0.252451  | -1.321011 |
| C  | -2.941136 | 0.133448  | -3.037626 |
| O  | -3.876094 | 0.629198  | -3.763234 |
| C  | 0.582594  | -1.200475 | 0.957708  |
| O  | 1.501764  | -1.524826 | 1.593970  |
| C  | -2.117854 | -1.609464 | 1.092126  |
| O  | -2.833676 | -2.145175 | 1.834583  |
| S  | -1.779158 | -0.600652 | -4.130698 |
| H  | -3.087000 | 0.116427  | -4.743471 |
| H  | -2.241967 | 0.690052  | 2.458781  |
| H  | -2.513226 | 2.960547  | 3.431785  |
| H  | -0.115305 | 4.480197  | 0.201962  |
| H  | -1.421372 | 4.910034  | 2.261503  |
| H  | 1.036064  | 3.981837  | -1.427188 |
| H  | 2.347098  | 3.239486  | -3.394688 |
| H  | 0.966219  | -0.763385 | -2.635982 |
| H  | 2.320113  | 0.795799  | -4.013600 |

#### M4-A1b

|    |           |           |           |
|----|-----------|-----------|-----------|
| C  | -1.724393 | 0.724997  | -1.859899 |
| O  | -2.144582 | 1.233552  | -2.818529 |
| Re | -1.032562 | -0.122358 | -0.278854 |
| N  | 0.959223  | -0.152164 | -1.199903 |

|   |           |           |           |
|---|-----------|-----------|-----------|
| C | 1.798610  | 0.871009  | -0.898652 |
| C | 1.272312  | 1.869990  | 0.052864  |
| N | -0.015529 | 1.687642  | 0.447595  |
| S | -0.301637 | -1.144133 | 1.960022  |
| C | 1.270185  | -1.903123 | 2.130619  |
| O | 1.441626  | -2.403898 | 3.380743  |
| C | -2.724658 | 0.145886  | 0.603896  |
| O | -3.736645 | 0.353999  | 1.136325  |
| C | -1.640539 | -1.849258 | -0.886627 |
| O | -1.971719 | -2.896748 | -1.259773 |
| S | 2.517854  | -2.094500 | 1.053189  |
| C | -0.564439 | 2.562344  | 1.312971  |
| C | 3.070428  | 0.955847  | -1.473964 |
| H | 0.630126  | -2.253466 | 3.896780  |
| C | 0.129848  | 3.653488  | 1.822304  |
| H | -1.590492 | 2.369278  | 1.601027  |
| H | -0.362006 | 4.325739  | 2.516444  |
| C | 1.454101  | 3.846418  | 1.428025  |
| C | 2.027309  | 2.945224  | 0.536509  |
| H | 2.033398  | 4.680595  | 1.810832  |
| H | 3.057756  | 3.071422  | 0.229464  |
| C | 3.488052  | -0.024181 | -2.368973 |
| H | 3.730670  | 1.777896  | -1.227963 |
| H | 4.473847  | 0.030571  | -2.819593 |
| C | 2.621494  | -1.073665 | -2.667892 |
| C | 1.373784  | -1.103479 | -2.056302 |
| H | 2.902433  | -1.868464 | -3.349594 |
| H | 0.679058  | -1.911210 | -2.247956 |

### TS5-A1b

|    |           |           |           |
|----|-----------|-----------|-----------|
| C  | 3.442716  | -1.086486 | 1.154752  |
| C  | 2.314119  | -0.500324 | 0.566993  |
| N  | 1.251544  | -1.256506 | 0.185697  |
| C  | 1.293764  | -2.589044 | 0.388863  |
| C  | 2.379971  | -3.229011 | 0.971617  |
| C  | 3.479477  | -2.461358 | 1.359080  |
| C  | 2.184092  | 0.951635  | 0.330839  |
| N  | 1.018943  | 1.348446  | -0.238515 |
| C  | 0.814371  | 2.661661  | -0.457343 |
| C  | 1.753957  | 3.633070  | -0.134008 |
| C  | 2.964790  | 3.232197  | 0.431817  |
| C  | 3.179153  | 1.878207  | 0.666878  |
| Re | -0.462341 | -0.226821 | -0.758286 |
| C  | -1.781297 | 0.876085  | -1.646275 |
| O  | -2.581679 | 1.556665  | -2.132271 |
| C  | -1.333661 | 0.043281  | 0.884351  |
| O  | -1.864303 | 0.209381  | 1.911295  |
| C  | -1.578250 | -1.756984 | -1.079656 |
| O  | -2.236835 | -2.703741 | -1.225943 |
| S  | 0.926490  | -1.745166 | -3.054635 |
| C  | 0.668127  | -0.270428 | -4.283494 |
| S  | 0.865372  | 1.204148  | -3.425471 |
| O  | 0.434957  | -0.534507 | -5.433807 |
| H  | 0.175331  | -2.665839 | -3.702171 |
| H  | 0.424361  | -3.148046 | 0.065789  |
| H  | 2.358476  | -4.304198 | 1.109597  |
| H  | 4.286013  | -0.474945 | 1.449635  |
| H  | 4.350170  | -2.924370 | 1.812328  |
| H  | 4.112463  | 1.548206  | 1.105393  |
| H  | 3.729228  | 3.959693  | 0.685263  |
| H  | -0.126145 | 2.928187  | -0.922718 |

|   |          |          |           |
|---|----------|----------|-----------|
| H | 1.537232 | 4.675940 | -0.336215 |
|---|----------|----------|-----------|

### TS3-A2

|    |           |           |           |
|----|-----------|-----------|-----------|
| C  | -1.449914 | -1.366192 | 1.741651  |
| Re | -0.293862 | -0.935585 | 0.264815  |
| C  | -0.871283 | -2.515138 | -0.669223 |
| O  | -1.254578 | -3.444717 | -1.253393 |
| O  | -2.148132 | -1.626457 | 2.636150  |
| N  | -1.731334 | 0.469757  | -0.621173 |
| C  | -1.582289 | 1.784955  | -0.309291 |
| C  | -0.514614 | 2.096713  | 0.663196  |
| N  | 0.209328  | 1.033749  | 1.104398  |
| S  | 1.106305  | -0.255014 | -1.769491 |
| C  | 2.669356  | 0.209224  | -1.228558 |
| S  | 3.972874  | 0.817499  | -2.212670 |
| C  | 1.135926  | -1.969357 | 1.057925  |
| O  | 1.977531  | -2.588977 | 1.558341  |
| O  | 3.090327  | 0.167924  | -0.006311 |
| C  | 1.192723  | 1.239784  | 2.001320  |
| C  | -0.254850 | 3.390590  | 1.128538  |
| C  | -2.411270 | 2.758260  | -0.880688 |
| C  | -2.694942 | 0.110699  | -1.492978 |
| H  | 4.191396  | 0.635606  | -0.599790 |
| C  | 1.494438  | 2.500038  | 2.506891  |
| H  | 1.756125  | 0.366894  | 2.301240  |
| H  | 2.298783  | 2.608248  | 3.225731  |
| C  | 0.758917  | 3.596471  | 2.060057  |
| H  | -0.835576 | 4.230860  | 0.769503  |
| H  | 0.969804  | 4.596067  | 2.426589  |
| C  | -3.402101 | 2.381093  | -1.781281 |
| H  | -2.280988 | 3.803467  | -0.630182 |
| H  | -4.045553 | 3.129700  | -2.232318 |
| C  | -3.548948 | 1.028916  | -2.092400 |
| H  | -2.770814 | -0.947771 | -1.710182 |
| H  | -4.304466 | 0.682969  | -2.788944 |

### M3-A2

|    |           |           |           |
|----|-----------|-----------|-----------|
| C  | -0.309096 | -0.083907 | -2.597915 |
| Re | 0.098767  | -0.163461 | -0.719134 |
| C  | 0.950765  | -1.871159 | -0.955511 |
| O  | 1.506355  | -2.882086 | -1.104625 |
| O  | -0.559293 | -0.035252 | -3.734484 |
| N  | 1.890381  | 1.088509  | -0.921588 |
| C  | 1.744692  | 2.418970  | -0.681667 |
| C  | 0.368490  | 2.872932  | -0.394227 |
| N  | -0.581885 | 1.900975  | -0.378515 |
| S  | 0.780070  | -0.171412 | 1.745250  |
| C  | -0.647008 | 0.270094  | 2.678105  |
| S  | -0.283067 | 0.319179  | 4.468937  |
| C  | -1.569440 | -1.079977 | -0.375747 |
| O  | -2.578369 | -1.621262 | -0.195638 |
| O  | -1.761574 | 0.527215  | 2.259617  |
| C  | -1.861671 | 2.241531  | -0.133375 |
| C  | 3.117284  | 0.607190  | -1.205446 |
| H  | -1.542131 | 0.664811  | 4.807509  |
| C  | -2.257168 | 3.555441  | 0.094428  |
| H  | -2.574898 | 1.429440  | -0.102468 |
| H  | -3.301218 | 3.771943  | 0.290466  |
| C  | -1.290456 | 4.559691  | 0.080310  |
| C  | 0.034822  | 4.212897  | -0.166138 |



|   |           |           |           |
|---|-----------|-----------|-----------|
| H | -1.560070 | 5.595579  | 0.260268  |
| H | 0.799118  | 4.979655  | -0.179450 |
| C | 4.248067  | 1.412992  | -1.263913 |
| H | 3.180849  | -0.458902 | -1.386238 |
| H | 5.210586  | 0.969999  | -1.494157 |
| C | 4.109573  | 2.779187  | -1.016337 |
| C | 2.846126  | 3.282912  | -0.725428 |
| H | 4.969087  | 3.441142  | -1.047672 |
| H | 2.720298  | 4.340036  | -0.528298 |

#### TS4-A2

|    |           |           |           |
|----|-----------|-----------|-----------|
| C  | -0.282610 | -0.123954 | -2.593748 |
| Re | 0.057065  | -0.124945 | -0.697339 |
| C  | 0.860023  | -1.867907 | -0.819737 |
| O  | 1.386599  | -2.902279 | -0.898130 |
| O  | -0.490443 | -0.125697 | -3.739415 |
| N  | 1.895515  | 1.059112  | -0.890822 |
| C  | 1.785814  | 2.403793  | -0.719446 |
| C  | 0.416475  | 2.913828  | -0.503106 |
| N  | -0.565715 | 1.973709  | -0.478640 |
| S  | 0.653595  | -0.042673 | 1.788572  |
| C  | -0.759867 | 0.523705  | 2.650486  |
| S  | -0.457754 | 0.701807  | 4.506887  |
| C  | -1.649790 | -0.968973 | -0.365398 |
| O  | -2.681448 | -1.466428 | -0.184647 |
| O  | -1.842305 | 0.822909  | 2.195268  |
| C  | -1.841707 | 2.366248  | -0.298294 |
| C  | 3.115306  | 0.526476  | -1.106822 |
| H  | -0.834303 | -0.566214 | 4.766877  |
| C  | -2.201049 | 3.700830  | -0.143076 |
| H  | -2.583268 | 1.580210  | -0.261036 |
| H  | -3.243543 | 3.958740  | 0.005028  |
| C  | -1.201291 | 4.672145  | -0.164295 |
| C  | 0.119547  | 4.272589  | -0.346512 |
| H  | -1.442310 | 5.722962  | -0.038785 |
| H  | 0.908973  | 5.013355  | -0.364932 |
| C  | 4.273253  | 1.292755  | -1.162387 |
| H  | 3.150133  | -0.548540 | -1.234866 |
| H  | 5.227997  | 0.809273  | -1.336713 |
| C  | 4.171550  | 2.673090  | -0.984712 |
| C  | 2.916179  | 3.229565  | -0.763693 |
| H  | 5.053020  | 3.305479  | -1.016208 |
| H  | 2.818530  | 4.298416  | -0.621491 |

#### M4-A2

|    |           |           |           |
|----|-----------|-----------|-----------|
| C  | -1.478909 | -1.421137 | 1.686543  |
| O  | -2.208857 | -1.712416 | 2.546072  |
| Re | -0.269447 | -0.942356 | 0.268194  |
| C  | 1.158462  | -1.927845 | 1.123910  |
| O  | 1.999783  | -2.518361 | 1.659060  |
| C  | -0.744024 | -2.533617 | -0.701009 |
| O  | -1.064055 | -3.471920 | -1.309691 |
| N  | -1.711118 | 0.416380  | -0.676877 |
| C  | -1.620385 | 1.734515  | -0.355460 |
| C  | -0.606824 | 2.079273  | 0.662500  |
| N  | 0.127946  | 1.039209  | 1.138591  |
| S  | 1.217356  | -0.215132 | -1.680786 |
| C  | 2.756389  | 0.310712  | -0.991716 |
| O  | 3.066450  | 0.332096  | 0.185318  |
| S  | 4.001001  | 0.892059  | -2.193265 |

|   |           |           |           |
|---|-----------|-----------|-----------|
| C | 1.062682  | 1.275494  | 2.078960  |
| C | -2.627033 | 0.028147  | -1.586967 |
| H | 3.277953  | 0.667626  | -3.307675 |
| C | 1.303280  | 2.544792  | 2.594523  |
| H | 1.639973  | 0.421492  | 2.404984  |
| H | 2.072447  | 2.677770  | 3.346816  |
| C | 0.556597  | 3.618196  | 2.111735  |
| C | -0.407629 | 3.381023  | 1.136234  |
| H | 0.721522  | 4.624272  | 2.484193  |
| H | -0.996323 | 4.203159  | 0.749187  |
| C | -3.488061 | 0.918587  | -2.217011 |
| H | -2.658285 | -1.031539 | -1.809233 |
| H | -4.204002 | 0.549381  | -2.942846 |
| C | -3.400532 | 2.273961  | -1.896657 |
| C | -2.459660 | 2.681059  | -0.956702 |
| H | -4.052184 | 3.001624  | -2.369758 |
| H | -2.376752 | 3.728813  | -0.696800 |

### TS5-A2

|    |           |           |           |
|----|-----------|-----------|-----------|
| C  | -1.837891 | 0.458034  | 1.811981  |
| O  | -2.290124 | 0.834461  | 2.815383  |
| Re | -1.091908 | -0.163294 | 0.151345  |
| N  | 0.875766  | -0.481739 | 1.091371  |
| C  | 1.740742  | 0.567255  | 1.092835  |
| C  | 1.283867  | 1.772735  | 0.372242  |
| N  | 0.038606  | 1.700694  | -0.166265 |
| S  | -0.122498 | -0.938007 | -2.092539 |
| C  | 1.778563  | -0.856954 | -1.971587 |
| O  | 2.412973  | 0.168108  | -1.911344 |
| C  | -1.819905 | -1.920465 | 0.457087  |
| O  | -2.219953 | -2.992621 | 0.655760  |
| C  | -2.703922 | 0.334772  | -0.778126 |
| O  | -3.659177 | 0.674219  | -1.345321 |
| S  | 2.254813  | -2.543557 | -1.971094 |
| C  | 1.243969  | -1.631584 | 1.690562  |
| C  | -0.430678 | 2.750214  | -0.869655 |
| H  | 0.517248  | -2.388117 | -1.998984 |
| C  | 2.464271  | -1.785561 | 2.337538  |
| H  | 0.531196  | -2.445148 | 1.643733  |
| H  | 2.709972  | -2.735812 | 2.797778  |
| C  | 3.348232  | -0.707726 | 2.362661  |
| C  | 2.981986  | 0.476394  | 1.730968  |
| H  | 4.311851  | -0.789269 | 2.855088  |
| H  | 3.663089  | 1.317720  | 1.726197  |
| C  | 0.302316  | 3.914909  | -1.060715 |
| H  | -1.424098 | 2.640340  | -1.286812 |
| H  | -0.123132 | 4.727311  | -1.639113 |
| C  | 1.577695  | 4.001760  | -0.501803 |
| C  | 2.069311  | 2.920395  | 0.220613  |
| H  | 2.183394  | 4.892667  | -0.633053 |
| H  | 3.064836  | 2.961328  | 0.643264  |

### TS2-B

|    |           |           |           |
|----|-----------|-----------|-----------|
| C  | -1.056426 | 0.405453  | 1.757692  |
| O  | -1.323476 | 0.623547  | 2.863312  |
| Re | -0.716111 | -0.009622 | -0.104566 |
| C  | -1.467948 | 1.695527  | -0.580599 |
| O  | -1.916501 | 2.714797  | -0.914179 |
| C  | -2.447008 | -0.806693 | -0.213328 |
| O  | -3.494933 | -1.310360 | -0.288566 |

|   |           |           |           |
|---|-----------|-----------|-----------|
| N | -0.118690 | -0.641826 | -2.124192 |
| C | 0.652651  | -1.757905 | -2.213144 |
| C | 0.898131  | -2.474628 | -0.942686 |
| N | 0.323496  | -1.930498 | 0.161248  |
| O | 1.329841  | 0.769236  | -0.189712 |
| C | 2.398005  | 0.796196  | 0.681230  |
| S | 2.360180  | 0.225569  | 2.231585  |
| S | 3.630835  | 1.550475  | -0.296783 |
| H | 2.131769  | 1.335624  | -0.973443 |
| C | -0.409620 | 0.044850  | -3.246501 |
| C | 1.651539  | -3.650448 | -0.858727 |
| C | 0.052104  | -0.334309 | -4.501869 |
| H | -1.029491 | 0.924267  | -3.120253 |
| H | -0.210644 | 0.256932  | -5.371896 |
| C | 0.854027  | -1.471384 | -4.602497 |
| C | 1.152458  | -2.188509 | -3.447860 |
| H | 1.240938  | -1.796346 | -5.563016 |
| H | 1.772824  | -3.073594 | -3.509218 |
| C | 1.804171  | -4.281958 | 0.373077  |
| H | 2.116874  | -4.071230 | -1.741057 |
| H | 2.387778  | -5.193766 | 0.450364  |
| C | 1.200320  | -3.722854 | 1.497167  |
| C | 0.480110  | -2.541188 | 1.350557  |
| H | 1.295453  | -4.172915 | 2.478734  |
| H | 0.018128  | -2.057664 | 2.200738  |

## M2-B

|    |           |           |          |
|----|-----------|-----------|----------|
| C  | -0.986657 | 0.261604  | 1.833915 |
| O  | -0.750942 | -0.023139 | 0.735691 |
| Re | -1.493125 | 0.653802  | 3.661983 |
| C  | -0.472723 | -0.871224 | 4.232087 |
| O  | 0.131405  | -1.784539 | 4.624142 |
| C  | -3.031020 | -0.455617 | 3.435707 |
| O  | -3.983357 | -1.115731 | 3.306243 |
| N  | -2.108345 | 1.360345  | 5.653545 |
| C  | -2.744412 | 2.559392  | 5.712010 |
| C  | -3.037702 | 3.197231  | 4.409900 |
| N  | -2.616800 | 2.517167  | 3.312726 |
| O  | 0.132983  | 2.000741  | 4.170611 |
| C  | 0.781870  | 2.848940  | 3.470469 |
| S  | 0.595491  | 3.234638  | 1.845680 |
| S  | 2.060829  | 3.743998  | 4.377254 |
| H  | 1.899520  | 3.089566  | 5.549376 |
| C  | -2.857681 | 3.028739  | 2.091233 |
| C  | -3.542919 | 4.225021  | 1.902005 |
| H  | -2.479424 | 2.459922  | 1.252603 |
| H  | -3.711207 | 4.591588  | 0.895812 |
| C  | -3.975203 | 4.933022  | 3.021651 |
| C  | -3.717705 | 4.414462  | 4.288017 |
| H  | -4.502262 | 5.875821  | 2.914600 |
| H  | -4.044650 | 4.953716  | 5.168062 |
| C  | -3.098502 | 3.125712  | 6.942537 |
| C  | -2.797053 | 2.454808  | 8.123921 |
| H  | -3.600937 | 4.084020  | 6.981286 |
| H  | -3.065429 | 2.887900  | 9.082299 |
| C  | -2.147468 | 1.222426  | 8.052253 |
| C  | -1.821071 | 0.714430  | 6.799508 |
| H  | -1.891167 | 0.660389  | 8.943389 |
| H  | -1.312302 | -0.236199 | 6.696120 |

### TS3-B1

|    |           |           |           |
|----|-----------|-----------|-----------|
| C  | 0.515298  | -1.483706 | 1.390695  |
| O  | 0.506602  | -0.753907 | 0.488657  |
| Re | 0.618026  | -2.702523 | 2.880889  |
| C  | -0.513074 | -1.518090 | 3.894066  |
| O  | -1.175638 | -0.824963 | 4.548365  |
| C  | 2.136763  | -1.792541 | 3.509840  |
| O  | 3.090342  | -1.236650 | 3.895714  |
| N  | 0.815559  | -4.322230 | 4.372798  |
| C  | 1.563841  | -5.404468 | 4.039575  |
| C  | 2.168359  | -5.370090 | 2.691949  |
| N  | 1.895012  | -4.262867 | 1.956928  |
| O  | -1.678211 | -3.962236 | 3.206960  |
| C  | -2.021644 | -4.359196 | 2.077124  |
| S  | -1.115775 | -4.086016 | 0.654535  |
| S  | -3.562834 | -5.287146 | 1.895594  |
| H  | -3.903311 | -5.213811 | 3.200204  |
| C  | 1.731431  | -6.470798 | 4.932306  |
| C  | 2.971890  | -6.397772 | 2.181000  |
| C  | 1.118198  | -6.426187 | 6.179951  |
| H  | 2.331337  | -7.328448 | 4.655237  |
| H  | 1.240866  | -7.246704 | 6.879794  |
| C  | 0.343015  | -5.313252 | 6.509198  |
| C  | 0.216017  | -4.289052 | 5.578598  |
| H  | -0.161356 | -5.234036 | 7.465766  |
| H  | -0.386178 | -3.414138 | 5.788001  |
| C  | 3.509058  | -6.280942 | 0.903839  |
| H  | 3.175969  | -7.281198 | 2.772976  |
| H  | 4.132558  | -7.070928 | 0.497480  |
| C  | 3.230091  | -5.133789 | 0.159216  |
| C  | 2.418086  | -4.156191 | 0.719994  |
| H  | 3.623590  | -4.994471 | -0.841438 |
| H  | 2.161519  | -3.259594 | 0.169691  |

### TS3-B2

|    |           |           |          |
|----|-----------|-----------|----------|
| C  | -1.024600 | 0.333588  | 1.622005 |
| O  | -0.878195 | 0.025688  | 0.514068 |
| Re | -1.375282 | 0.768932  | 3.475309 |
| C  | -0.255409 | -0.704923 | 3.993994 |
| O  | 0.413492  | -1.586100 | 4.352193 |
| C  | -2.889755 | -0.394680 | 3.423475 |
| O  | -3.827648 | -1.086569 | 3.400229 |
| N  | -1.826892 | 1.525436  | 5.493002 |
| C  | -2.488478 | 2.709132  | 5.572303 |
| C  | -2.915311 | 3.296078  | 4.282871 |
| N  | -2.579508 | 2.588575  | 3.173389 |
| O  | 0.233805  | 2.185095  | 3.798677 |
| C  | 0.804133  | 3.034043  | 3.044614 |
| S  | 0.511820  | 3.359828  | 1.432229 |
| S  | 2.096713  | 4.026093  | 3.971393 |
| H  | 3.101399  | 3.186937  | 3.649877 |
| C  | -2.742444 | 3.309426  | 6.810956 |
| C  | -3.628710 | 4.496073  | 4.183527 |
| C  | -2.310831 | 2.689140  | 7.979773 |
| H  | -3.266191 | 4.255415  | 6.865184 |
| H  | -2.499410 | 3.149290  | 8.944501 |
| C  | -1.633337 | 1.473769  | 7.886993 |
| C  | -1.411790 | 0.929851  | 6.626356 |
| H  | -1.274398 | 0.952669  | 8.767437 |
| H  | -0.884515 | -0.008681 | 6.507024 |
| C  | -4.006549 | 4.969073  | 2.929511 |

|   |           |          |          |
|---|-----------|----------|----------|
| H | -3.887821 | 5.058211 | 5.071847 |
| H | -4.559220 | 5.899018 | 2.840791 |
| C | -3.660523 | 4.233067 | 1.797902 |
| C | -2.938616 | 3.054972 | 1.962746 |
| H | -3.923609 | 4.564276 | 0.799794 |
| H | -2.625427 | 2.464478 | 1.112170 |

### M3-B2

|    |           |           |           |
|----|-----------|-----------|-----------|
| C  | 2.195422  | -1.019616 | -0.860668 |
| O  | 3.257852  | -1.131424 | -1.310303 |
| Re | 0.374562  | -0.919128 | -0.210135 |
| N  | -0.272088 | 0.886431  | -1.294528 |
| C  | -1.499879 | 1.380161  | -0.989998 |
| C  | -2.283358 | 0.594933  | -0.010908 |
| N  | -1.690484 | -0.537148 | 0.449589  |
| O  | 0.674389  | 0.472873  | 1.421328  |
| C  | 1.480076  | 1.448632  | 1.588873  |
| S  | 2.664736  | 2.015205  | 0.539897  |
| C  | 0.738733  | -2.424595 | 0.928448  |
| O  | 0.913889  | -3.333809 | 1.631765  |
| C  | -0.150564 | -2.104100 | -1.613005 |
| O  | -0.488655 | -2.812199 | -2.475525 |
| S  | 1.180484  | 2.217481  | 3.203794  |
| H  | 2.125297  | 3.168646  | 3.091742  |
| C  | -3.560713 | 0.965913  | 0.425246  |
| C  | -1.974468 | 2.552391  | -1.589485 |
| C  | -4.235629 | 0.166988  | 1.343502  |
| H  | -4.024121 | 1.872991  | 0.058202  |
| H  | -5.224652 | 0.448987  | 1.690420  |
| C  | -3.618980 | -0.994752 | 1.807419  |
| C  | -2.348181 | -1.307025 | 1.336511  |
| H  | -4.102093 | -1.649338 | 2.524168  |
| H  | -1.828881 | -2.195478 | 1.674359  |
| C  | -1.179186 | 3.220078  | -2.517169 |
| H  | -2.952459 | 2.942844  | -1.337899 |
| H  | -1.537214 | 4.129902  | -2.988545 |
| C  | 0.078311  | 2.703694  | -2.823884 |
| C  | 0.497758  | 1.542057  | -2.182852 |
| H  | 0.738055  | 3.192064  | -3.531970 |
| H  | 1.475953  | 1.119612  | -2.369701 |

### TS4-B2a

|    |           |           |           |
|----|-----------|-----------|-----------|
| C  | 2.055633  | -0.807615 | -1.446217 |
| O  | 2.933342  | -0.834366 | -2.201359 |
| Re | 0.511179  | -0.810692 | -0.264668 |
| N  | -0.727257 | 0.599928  | -1.339105 |
| C  | -1.907633 | 0.898593  | -0.827051 |
| C  | -2.264583 | 0.160784  | 0.375962  |
| N  | -1.328854 | -0.645647 | 0.845056  |
| C  | 1.439723  | -1.902565 | 1.033814  |
| O  | 1.942643  | -2.552573 | 1.850823  |
| C  | -0.092369 | -2.364640 | -1.145186 |
| O  | -0.467241 | -3.315144 | -1.709142 |
| O  | 0.811884  | 0.794176  | 1.858533  |
| C  | 1.411001  | 1.789153  | 1.425804  |
| S  | 1.881774  | 1.942328  | -0.219520 |
| S  | 1.778129  | 3.089495  | 2.625197  |
| H  | 2.388967  | 3.934931  | 1.774227  |
| C  | -3.538588 | 0.314324  | 1.014346  |
| C  | -2.763698 | 1.901214  | -1.387493 |

|   |           |           |           |
|---|-----------|-----------|-----------|
| C | -3.814757 | -0.382483 | 2.137661  |
| H | -4.281503 | 0.986601  | 0.594795  |
| H | -4.778786 | -0.275720 | 2.629600  |
| C | -2.826929 | -1.266417 | 2.668416  |
| C | -1.630022 | -1.393446 | 2.052259  |
| H | -3.033355 | -1.840672 | 3.568447  |
| H | -0.882506 | -2.072304 | 2.456976  |
| C | -2.384464 | 2.549638  | -2.509651 |
| H | -3.712093 | 2.137501  | -0.913929 |
| H | -3.023606 | 3.312022  | -2.949034 |
| C | -1.133242 | 2.219301  | -3.114312 |
| C | -0.340824 | 1.273827  | -2.560266 |
| H | -0.812638 | 2.727333  | -4.020642 |
| H | 0.610938  | 1.028336  | -3.022153 |

#### TS4-B2b

|    |           |           |           |
|----|-----------|-----------|-----------|
| C  | -1.332551 | -2.069487 | 0.741903  |
| Re | 0.176974  | -1.015433 | 0.152032  |
| C  | 1.226728  | -1.820722 | 1.530583  |
| O  | 1.872498  | -2.287748 | 2.380499  |
| O  | -2.202249 | -2.720456 | 1.146767  |
| N  | -0.214180 | 0.813657  | 1.310444  |
| C  | 0.573130  | 1.888721  | 1.043370  |
| C  | 1.661461  | 1.662834  | 0.066205  |
| N  | 1.756005  | 0.403631  | -0.434149 |
| O  | -0.793571 | 0.106916  | -1.421221 |
| C  | -1.930998 | 0.622440  | -1.591125 |
| S  | -2.336250 | 1.695334  | -2.910402 |
| C  | 0.647570  | -2.441125 | -1.053437 |
| O  | 0.967897  | -3.277941 | -1.792579 |
| S  | -3.359540 | 0.412411  | -0.578438 |
| H  | -3.644431 | 1.413968  | -1.856453 |
| C  | 2.729142  | 0.121158  | -1.319607 |
| C  | -1.216089 | 0.938899  | 2.200647  |
| C  | -1.475654 | 2.127951  | 2.875448  |
| H  | -1.823867 | 0.058652  | 2.364045  |
| H  | -2.298318 | 2.174751  | 3.579802  |
| C  | -0.677615 | 3.237200  | 2.605164  |
| C  | 0.356370  | 3.115037  | 1.679873  |
| H  | -0.855804 | 4.185453  | 3.102197  |
| H  | 0.983633  | 3.968936  | 1.457610  |
| C  | 3.654282  | 1.067513  | -1.747748 |
| H  | 2.755866  | -0.895277 | -1.693030 |
| H  | 4.417159  | 0.786725  | -2.465144 |
| C  | 3.564755  | 2.363923  | -1.242295 |
| C  | 2.559414  | 2.661508  | -0.326738 |
| H  | 4.263049  | 3.133274  | -1.556014 |
| H  | 2.473226  | 3.664773  | 0.070784  |

#### M4-B2b

|    |           |           |           |
|----|-----------|-----------|-----------|
| C  | -2.444591 | 0.328665  | 0.737736  |
| Re | -0.851027 | -0.584784 | 0.154949  |
| C  | -1.174279 | -1.897588 | 1.505635  |
| O  | -1.349934 | -2.693397 | 2.338451  |
| O  | -3.395473 | 0.853064  | 1.149230  |
| N  | 0.612286  | 0.555995  | 1.336538  |
| C  | 1.921660  | 0.342461  | 1.042771  |
| C  | 2.200594  | -0.755805 | 0.090642  |
| N  | 1.116417  | -1.423502 | -0.379674 |
| O  | -0.117423 | 0.788076  | -1.329333 |

|   |           |           |           |
|---|-----------|-----------|-----------|
| C | -0.086403 | 2.028584  | -1.624308 |
| S | 1.236742  | 2.824103  | -2.282284 |
| C | -1.920063 | -1.586482 | -1.095735 |
| O | -2.530704 | -2.209261 | -1.862507 |
| S | -1.649802 | 2.897954  | -1.277391 |
| H | -1.234094 | 4.106090  | -1.695649 |
| C | 1.294184  | -2.451278 | -1.228170 |
| C | 0.284349  | 1.525330  | 2.210819  |
| C | 2.552187  | -2.864757 | -1.654339 |
| H | 0.394867  | -2.945374 | -1.575806 |
| H | 2.639908  | -3.696720 | -2.344020 |
| C | 3.672268  | -2.179315 | -1.186011 |
| C | 3.493092  | -1.118411 | -0.303008 |
| H | 4.670752  | -2.462355 | -1.503588 |
| H | 4.353167  | -0.574344 | 0.065613  |
| C | 1.234847  | 2.325863  | 2.835560  |
| H | -0.773381 | 1.660003  | 2.401352  |
| H | 0.915991  | 3.097141  | 3.527537  |
| C | 2.580572  | 2.119611  | 2.536413  |
| C | 2.924723  | 1.117140  | 1.634315  |
| H | 3.352124  | 2.731534  | 2.992578  |
| H | 3.965190  | 0.950517  | 1.386918  |

#### TS5-B2b

|    |           |           |           |
|----|-----------|-----------|-----------|
| C  | 1.209675  | -0.374316 | -2.252541 |
| O  | 1.734292  | -0.201386 | -3.274524 |
| Re | 0.268722  | -0.641977 | -0.596630 |
| C  | 1.586301  | -1.962823 | -0.091133 |
| O  | 2.345298  | -2.774050 | 0.234339  |
| C  | -0.764299 | -1.977542 | -1.417073 |
| O  | -1.418987 | -2.797374 | -1.930016 |
| N  | -1.322804 | 0.868812  | -0.875332 |
| C  | -2.231794 | 1.018697  | 0.123202  |
| C  | -2.024544 | 0.162959  | 1.310685  |
| N  | -0.968911 | -0.685853 | 1.240940  |
| O  | 1.537513  | 0.285622  | 1.637453  |
| C  | 2.347195  | 1.187505  | 1.377975  |
| S  | 1.688802  | 2.099030  | -0.238389 |
| S  | 3.742437  | 1.732083  | 2.089684  |
| H  | 2.862647  | 2.234943  | -0.884503 |
| C  | -0.691809 | -1.473477 | 2.296128  |
| C  | -1.445244 | 1.620235  | -1.987761 |
| C  | -2.469737 | 2.541827  | -2.164765 |
| H  | -0.690070 | 1.471122  | -2.749320 |
| H  | -2.519834 | 3.118527  | -3.081494 |
| C  | -3.408942 | 2.702087  | -1.145192 |
| C  | -3.285980 | 1.933530  | 0.007647  |
| H  | -4.222420 | 3.413684  | -1.244309 |
| H  | -4.004529 | 2.045026  | 0.809750  |
| C  | -1.459107 | -1.470295 | 3.456061  |
| H  | 0.180040  | -2.107705 | 2.205341  |
| H  | -1.188538 | -2.122977 | 4.278343  |
| C  | -2.553487 | -0.610201 | 3.533034  |
| C  | -2.836103 | 0.216650  | 2.449478  |
| H  | -3.173074 | -0.575358 | 4.423472  |
| H  | -3.673871 | 0.900932  | 2.497455  |

#### TS4-B2c

|    |           |          |          |
|----|-----------|----------|----------|
| O  | -0.261926 | 0.009244 | 0.125507 |
| C  | -0.149270 | 0.031907 | 1.285878 |
| Re | 0.070684  | 0.061678 | 3.179440 |

|   |           |           |          |
|---|-----------|-----------|----------|
| N | 1.677751  | 1.558388  | 3.156658 |
| C | 1.470921  | 2.888202  | 3.131359 |
| H | 0.442476  | 3.209345  | 3.018590 |
| C | 2.503405  | 3.812178  | 3.248628 |
| H | 2.280927  | 4.873052  | 3.224752 |
| C | 3.806075  | 3.338764  | 3.404882 |
| H | 4.639315  | 4.026592  | 3.508320 |
| C | 4.025510  | 1.964840  | 3.427820 |
| H | 5.030977  | 1.582636  | 3.550064 |
| C | 2.943554  | 1.086060  | 3.300385 |
| C | 3.090564  | -0.385823 | 3.291771 |
| C | 4.324759  | -1.032215 | 3.403928 |
| H | 5.235443  | -0.460556 | 3.528948 |
| C | 4.380354  | -2.422651 | 3.364570 |
| H | 5.332990  | -2.933922 | 3.458741 |
| C | 3.196381  | -3.139861 | 3.211980 |
| H | 3.185266  | -4.223545 | 3.185373 |
| C | 2.000128  | -2.436667 | 3.114640 |
| H | 1.055154  | -2.955793 | 3.011926 |
| N | 1.941490  | -1.093951 | 3.147408 |
| C | -1.150139 | -1.422250 | 3.334129 |
| O | -1.854315 | -2.341700 | 3.411794 |
| C | -1.419180 | 1.271415  | 3.337654 |
| O | -2.291687 | 2.033345  | 3.426894 |
| O | 0.580821  | 0.168228  | 5.280567 |
| C | 0.574641  | -0.618288 | 6.288363 |
| S | 1.839015  | -1.604989 | 6.787804 |
| S | -0.991951 | -0.525576 | 7.198374 |
| H | -0.677438 | -1.426629 | 8.146864 |

[Re(OCH<sub>3</sub>)(CO)<sub>3</sub>(bipy)]

|    |           |           |           |
|----|-----------|-----------|-----------|
| C  | 0.060969  | 0.124096  | -2.019518 |
| Re | 0.018825  | 0.101298  | -0.066614 |
| O  | -2.053741 | 0.038888  | -0.149569 |
| C  | -2.880786 | 1.081876  | -0.586309 |
| O  | 0.072822  | 0.084985  | -3.176136 |
| C  | 0.137012  | 2.027963  | 0.079868  |
| O  | 0.211958  | 3.176994  | 0.231150  |
| C  | 1.964665  | 0.039938  | -0.056442 |
| O  | 3.128405  | 0.021900  | -0.072405 |
| N  | -0.331868 | -1.998009 | 0.158473  |
| C  | -0.747613 | -2.398279 | 1.325399  |
| C  | -0.654343 | -1.416226 | 2.379147  |
| N  | -0.212228 | -0.246900 | 2.002808  |
| C  | -0.042048 | 0.717824  | 3.058245  |
| C  | -1.203321 | -3.751047 | 1.580056  |
| C  | -0.387664 | -2.982800 | -0.890657 |
| H  | -3.931556 | 0.775303  | -0.471063 |
| H  | -2.738441 | 2.013093  | -0.009359 |
| H  | -2.727629 | 1.329973  | -1.651343 |
| C  | -0.616800 | -4.263702 | -0.592310 |
| H  | -0.242946 | -2.682677 | -1.927433 |
| H  | -0.658995 | -5.008450 | -1.385714 |
| C  | -1.208827 | -4.650394 | 0.593462  |
| H  | -1.541082 | -4.033396 | 2.576107  |
| H  | -1.551080 | -5.666369 | 0.784718  |
| C  | -0.221748 | 0.354339  | 4.330177  |
| H  | 0.233237  | 1.743902  | 2.818865  |
| H  | -0.093050 | 1.083912  | 5.128351  |
| C  | -0.588289 | -1.011881 | 4.648910  |
| C  | -0.746060 | -1.906260 | 3.670433  |



|   |           |           |          |
|---|-----------|-----------|----------|
| H | -0.734876 | -1.308386 | 5.686464 |
| H | -1.021345 | -2.932338 | 3.909812 |

### TS1-OCH<sub>3</sub>

|    |           |           |           |
|----|-----------|-----------|-----------|
| C  | -1.368928 | 0.889587  | 2.067346  |
| Re | -0.961974 | 0.479588  | 0.223094  |
| C  | -2.616691 | -0.470809 | 0.085159  |
| O  | -3.617501 | -1.059629 | -0.022119 |
| O  | -1.655601 | 1.099206  | 3.171527  |
| N  | -0.301158 | -0.159355 | -1.781703 |
| C  | 0.455086  | -1.286160 | -1.850305 |
| C  | 0.675850  | -1.994432 | -0.571640 |
| N  | 0.154923  | -1.397486 | 0.532097  |
| O  | 0.984370  | 1.448406  | 0.283356  |
| C  | 1.400481  | 2.424903  | -0.655105 |
| C  | -1.873439 | 2.091741  | -0.281898 |
| O  | -2.435530 | 3.051136  | -0.627383 |
| C  | 2.463900  | 0.722537  | 1.209746  |
| S  | 3.541622  | 0.188907  | 0.124608  |
| S  | 2.117121  | 0.912891  | 2.773441  |
| C  | -0.568076 | 0.518898  | -2.914429 |
| C  | 0.318814  | -1.986320 | 1.731403  |
| H  | 2.084787  | 3.133232  | -0.170806 |
| H  | 1.921467  | 1.976453  | -1.512958 |
| H  | 0.533192  | 2.987154  | -1.020468 |
| C  | -0.094098 | 0.123067  | -4.160033 |
| H  | -1.181148 | 1.405378  | -2.806181 |
| H  | -0.337926 | 0.709352  | -5.038959 |
| C  | 0.695347  | -1.024329 | -4.238851 |
| C  | 0.968152  | -1.733661 | -3.073518 |
| H  | 1.093474  | -1.362091 | -5.190381 |
| H  | 1.584227  | -2.622746 | -3.116657 |
| C  | 0.989967  | -3.194378 | 1.890273  |
| H  | -0.095339 | -1.460654 | 2.582050  |
| H  | 1.098027  | -3.620097 | 2.881374  |
| C  | 1.517024  | -3.819880 | 0.761833  |
| C  | 1.355306  | -3.213166 | -0.480354 |
| H  | 2.049726  | -4.761798 | 0.844857  |
| H  | 1.763244  | -3.682719 | -1.366280 |

### M1-OCH<sub>3</sub>

|    |           |           |           |
|----|-----------|-----------|-----------|
| C  | -1.321477 | 0.818192  | 2.153500  |
| Re | -0.931873 | 0.470513  | 0.282864  |
| C  | -2.598363 | -0.425081 | 0.126904  |
| O  | -3.612923 | -0.985989 | 0.014080  |
| O  | -1.629809 | 0.991167  | 3.255260  |
| N  | -0.302747 | -0.101582 | -1.747215 |
| C  | 0.430592  | -1.240269 | -1.869635 |
| C  | 0.670722  | -1.990907 | -0.619981 |
| N  | 0.160541  | -1.432787 | 0.509646  |
| O  | 1.112544  | 1.488374  | 0.334978  |
| C  | 1.474589  | 2.489923  | -0.645510 |
| C  | -1.801569 | 2.124487  | -0.156395 |
| O  | -2.333706 | 3.111928  | -0.468232 |
| C  | 2.245716  | 0.792636  | 0.985679  |
| S  | 3.452894  | 0.253365  | -0.037696 |
| S  | 2.036770  | 0.682966  | 2.636577  |
| C  | 0.891496  | -1.666120 | -3.121586 |
| C  | 0.338880  | -2.061103 | 1.687130  |
| H  | 2.264113  | 3.117110  | -0.226560 |

|   |           |           |           |
|---|-----------|-----------|-----------|
| H | 1.830051  | 2.027556  | -1.568458 |
| H | 0.579307  | 3.087931  | -0.819389 |
| C | 1.010544  | -3.274743 | 1.795471  |
| H | -0.062996 | -1.565293 | 2.560394  |
| H | 1.131289  | -3.732898 | 2.770324  |
| C | 1.525877  | -3.859198 | 0.640812  |
| C | 1.350600  | -3.211483 | -0.578658 |
| H | 2.063178  | -4.801074 | 0.686115  |
| H | 1.756233  | -3.646536 | -1.482853 |
| C | 0.597813  | -0.920226 | -4.257368 |
| H | 1.484253  | -2.567628 | -3.207133 |
| H | 0.956994  | -1.240927 | -5.230047 |
| C | -0.163085 | 0.242397  | -4.123060 |
| C | -0.591145 | 0.612505  | -2.854416 |
| H | -0.422018 | 0.856606  | -4.978225 |
| H | -1.185097 | 1.506019  | -2.704085 |

### TS2-A-OCH<sub>3</sub>

|    |           |           |           |
|----|-----------|-----------|-----------|
| C  | 1.317951  | -1.770410 | -1.490946 |
| Re | 0.940445  | -0.427061 | -0.232255 |
| C  | 2.431565  | 0.614597  | -0.904141 |
| O  | 3.333571  | 1.173683  | -1.367941 |
| O  | 1.541574  | -2.600929 | -2.280617 |
| N  | -0.687567 | 0.420770  | -1.481609 |
| C  | -1.957495 | 0.038797  | -1.191743 |
| C  | -2.085468 | -1.027513 | -0.180343 |
| N  | -0.923633 | -1.432043 | 0.400565  |
| C  | 2.131063  | -1.274071 | 1.010299  |
| O  | 2.811720  | -1.826104 | 1.776403  |
| O  | 0.196925  | 0.877515  | 1.826072  |
| C  | -0.134837 | 0.287685  | 3.102139  |
| C  | -0.094567 | 2.248021  | 1.621218  |
| S  | 0.697056  | 2.810222  | 0.232789  |
| S  | -1.089939 | 3.063387  | 2.679771  |
| C  | -0.961369 | -2.452062 | 1.283767  |
| C  | -0.489148 | 1.341104  | -2.445704 |
| H  | 0.364942  | -0.680927 | 3.118377  |
| H  | 0.239464  | 0.920415  | 3.908317  |
| H  | -1.216482 | 0.176104  | 3.209202  |
| C  | -2.137178 | -3.095490 | 1.646791  |
| H  | -0.008754 | -2.755743 | 1.700596  |
| H  | -2.104830 | -3.908146 | 2.363915  |
| C  | -3.336591 | -2.674028 | 1.068468  |
| C  | -3.305257 | -1.636433 | 0.143783  |
| H  | -4.276915 | -3.151503 | 1.324580  |
| H  | -4.221594 | -1.309279 | -0.330997 |
| C  | -1.530990 | 1.921927  | -3.157698 |
| H  | 0.539253  | 1.619384  | -2.634193 |
| H  | -1.311219 | 2.654605  | -3.925787 |
| C  | -2.841663 | 1.565646  | -2.836905 |
| C  | -3.055114 | 0.615485  | -1.844772 |
| H  | -3.683496 | 2.021828  | -3.347835 |
| H  | -4.064969 | 0.331175  | -1.577292 |

### M2-A-OCH<sub>3</sub>

|    |           |           |           |
|----|-----------|-----------|-----------|
| C  | -0.611076 | -0.701360 | -2.590253 |
| Re | -0.141222 | -0.756370 | -0.723686 |
| C  | 0.605785  | -2.517925 | -0.938431 |
| O  | 1.095323  | -3.563531 | -1.072820 |
| O  | -0.894060 | -0.673864 | -3.719917 |

|   |           |           |           |
|---|-----------|-----------|-----------|
| N | 1.709177  | 0.390638  | -1.010474 |
| C | 1.657745  | 1.721355  | -0.734753 |
| C | 0.324481  | 2.251233  | -0.385106 |
| N | -0.686818 | 1.341878  | -0.372644 |
| S | 0.721364  | -0.694214 | 1.685696  |
| C | -0.527523 | -0.428605 | 2.872706  |
| S | -0.193318 | -0.218732 | 4.490576  |
| C | -1.843391 | -1.563215 | -0.310844 |
| O | -2.886841 | -2.024698 | -0.093172 |
| O | -1.776530 | -0.414978 | 2.355602  |
| C | -2.903478 | -0.316412 | 3.243143  |
| C | 0.084053  | 3.601515  | -0.103760 |
| C | 2.890457  | -0.158676 | -1.356712 |
| H | -3.777324 | -0.394720 | 2.594153  |
| H | -2.888470 | -1.132039 | 3.970096  |
| H | -2.890436 | 0.637136  | 3.777871  |
| C | 4.066344  | 0.576899  | -1.444626 |
| H | 2.879165  | -1.222162 | -1.561763 |
| H | 4.989231  | 0.080753  | -1.723456 |
| C | 4.024425  | 1.942563  | -1.161297 |
| C | 2.807997  | 2.516836  | -0.807027 |
| H | 4.922302  | 2.549979  | -1.212799 |
| H | 2.757389  | 3.574651  | -0.581868 |
| C | -1.207231 | 4.025794  | 0.191891  |
| H | 0.897190  | 4.316345  | -0.111427 |
| H | -1.402636 | 5.069566  | 0.415893  |
| C | -2.239085 | 3.086589  | 0.194735  |
| C | -1.935756 | 1.760260  | -0.089362 |
| H | -3.262546 | 3.366486  | 0.418255  |
| H | -2.703070 | 0.996780  | -0.086413 |

### TS3-A1-OCH<sub>3</sub>

|    |           |           |           |
|----|-----------|-----------|-----------|
| C  | 0.433994  | -0.283712 | -2.634571 |
| O  | 0.404963  | -0.196513 | -3.796619 |
| Re | 0.485074  | -0.427422 | -0.721171 |
| C  | -0.359922 | -2.155772 | -0.802510 |
| O  | -0.899381 | -3.184078 | -0.848086 |
| S  | 0.641610  | -0.402809 | 1.849705  |
| C  | -0.593076 | -1.539958 | 2.416118  |
| S  | -2.211528 | -1.197808 | 2.621143  |
| N  | -1.323605 | 0.785818  | -0.446368 |
| C  | -1.141936 | 2.097108  | -0.136653 |
| C  | 0.258992  | 2.563336  | -0.123604 |
| N  | 1.197288  | 1.628546  | -0.432707 |
| C  | 2.203203  | -1.295513 | -0.799676 |
| O  | 3.257476  | -1.781710 | -0.840279 |
| O  | -0.044566 | -2.723771 | 2.719238  |
| C  | -0.866042 | -3.784560 | 3.241775  |
| C  | -2.575903 | 0.295895  | -0.494718 |
| C  | 2.495795  | 1.989729  | -0.462793 |
| H  | -0.177030 | -4.613781 | 3.405001  |
| H  | -1.640758 | -4.054558 | 2.519938  |
| H  | -1.337594 | -3.474037 | 4.177699  |
| C  | -3.701375 | 1.080535  | -0.262435 |
| H  | -2.669586 | -0.756282 | -0.729412 |
| H  | -4.686263 | 0.630353  | -0.313224 |
| C  | -3.525203 | 2.424558  | 0.056501  |
| C  | -2.231321 | 2.935406  | 0.121221  |
| H  | -4.377109 | 3.066603  | 0.256463  |
| H  | -2.075953 | 3.977450  | 0.370980  |
| C  | 2.924160  | 3.283443  | -0.190760 |

|   |           |          |           |
|---|-----------|----------|-----------|
| H | 3.202018  | 1.206458 | -0.709893 |
| H | 3.982311  | 3.517077 | -0.227178 |
| C | 1.969709  | 4.249550 | 0.130747  |
| C | 0.628221  | 3.884105 | 0.161024  |
| H | 2.263882  | 5.269936 | 0.355116  |
| H | -0.125291 | 4.620403 | 0.410276  |

### M3-A1-OCH<sub>3</sub>

|    |           |           |           |
|----|-----------|-----------|-----------|
| C  | 0.407063  | 0.552344  | -2.664745 |
| Re | 0.506659  | 0.568645  | -0.744727 |
| S  | 0.393382  | 0.713950  | 1.805163  |
| C  | 1.209243  | -0.575969 | 2.652428  |
| O  | 1.118677  | -0.326965 | 3.975721  |
| C  | 1.708914  | -1.234860 | 4.918122  |
| O  | 0.344721  | 0.543113  | -3.828085 |
| N  | -0.532912 | -1.363487 | -0.579525 |
| C  | -1.868217 | -1.326045 | -0.329257 |
| C  | -2.471183 | 0.021651  | -0.272943 |
| N  | -1.622630 | 1.058693  | -0.503442 |
| C  | 1.176021  | 2.370336  | -0.779760 |
| O  | 1.536456  | 3.476054  | -0.800555 |
| C  | 2.336939  | -0.055621 | -0.832286 |
| O  | 3.433077  | -0.415961 | -0.940471 |
| S  | 1.987860  | -1.921512 | 2.037640  |
| C  | 0.080162  | -2.557885 | -0.682520 |
| C  | -2.109027 | 2.315588  | -0.490071 |
| H  | 1.265652  | -2.230071 | 4.825020  |
| H  | 2.787626  | -1.307877 | 4.756953  |
| H  | 1.490259  | -0.800595 | 5.894683  |
| C  | -0.601017 | -3.764287 | -0.548835 |
| H  | 1.144023  | -2.532983 | -0.873418 |
| H  | -0.057031 | -4.697582 | -0.640261 |
| C  | -1.967729 | -3.736433 | -0.280187 |
| C  | -2.606721 | -2.503918 | -0.170626 |
| H  | -2.530771 | -4.656541 | -0.159458 |
| H  | -3.669430 | -2.463685 | 0.032591  |
| C  | -3.447542 | 2.603040  | -0.249670 |
| H  | -1.392434 | 3.106338  | -0.675741 |
| H  | -3.782493 | 3.634282  | -0.248480 |
| C  | -4.325595 | 1.546116  | -0.008057 |
| C  | -3.830537 | 0.246262  | -0.022898 |
| H  | -5.376978 | 1.729307  | 0.189516  |
| H  | -4.497043 | -0.586239 | 0.163982  |

### TS4-A1a-OCH<sub>3</sub>

|    |           |           |           |
|----|-----------|-----------|-----------|
| C  | -0.905811 | 2.669409  | -0.459720 |
| N  | -1.032411 | 1.339993  | -0.282433 |
| C  | -2.204321 | 0.851169  | 0.194568  |
| C  | -3.266052 | 1.705055  | 0.521004  |
| C  | -3.126387 | 3.076791  | 0.340467  |
| C  | -1.923519 | 3.568862  | -0.167996 |
| Re | 0.599521  | -0.108875 | -0.712140 |
| C  | 1.975746  | 1.129195  | -1.248181 |
| O  | 2.768079  | 1.894816  | -1.611754 |
| C  | -2.274633 | -0.618481 | 0.328248  |
| N  | -1.151768 | -1.292865 | -0.024688 |
| C  | -1.150352 | -2.638006 | 0.047483  |
| C  | -2.251301 | -3.371205 | 0.471978  |
| C  | -3.407699 | -2.685606 | 0.847094  |
| C  | -3.416999 | -1.297072 | 0.772772  |
| C  | 0.050745  | -0.266365 | -2.501586 |

|   |           |           |           |
|---|-----------|-----------|-----------|
| O | -0.301318 | -0.363591 | -3.612495 |
| C | 1.849068  | -1.549861 | -0.974042 |
| O | 2.562829  | -2.446282 | -1.159930 |
| S | 1.458514  | 1.683381  | 1.780427  |
| C | 1.590250  | 0.270348  | 2.696326  |
| S | 1.292610  | -1.302775 | 2.111265  |
| O | 1.960638  | 0.415994  | 3.988510  |
| C | 2.037327  | -0.858264 | 4.563301  |
| H | -4.305888 | -0.747670 | 1.056249  |
| H | -4.286919 | -3.221679 | 1.190031  |
| H | -2.192659 | -4.453184 | 0.510588  |
| H | -0.228757 | -3.129297 | -0.238946 |
| H | -4.191825 | 1.304416  | 0.914461  |
| H | -3.940967 | 3.748249  | 0.592637  |
| H | -1.763966 | 4.629283  | -0.327886 |
| H | 0.050076  | 3.011259  | -0.836360 |
| H | 2.334680  | -0.768373 | 5.607055  |
| H | 1.063784  | -1.342592 | 4.503628  |
| H | 2.773169  | -1.455017 | 4.026326  |

#### M4-A1a-OCH<sub>3</sub>

|    |           |           |           |
|----|-----------|-----------|-----------|
| C  | 0.000000  | 0.000000  | 0.000000  |
| C  | 0.000000  | 0.000000  | 1.399561  |
| N  | 1.164991  | 0.000000  | 2.097545  |
| C  | 2.329892  | -0.055465 | 1.424803  |
| C  | 2.396804  | -0.088075 | 0.037032  |
| C  | 1.206108  | -0.047946 | -0.689354 |
| C  | -1.235522 | 0.002418  | 2.210561  |
| N  | -1.058506 | 0.004321  | 3.557057  |
| C  | -2.139235 | -0.046751 | 4.358349  |
| C  | -3.439204 | -0.076659 | 3.867802  |
| C  | -3.631944 | -0.038450 | 2.486354  |
| C  | -2.519604 | 0.004966  | 1.653876  |
| Re | 1.010523  | 0.127758  | 4.285309  |
| C  | 2.896573  | 0.173349  | 4.675695  |
| O  | 4.042106  | 0.200657  | 4.868734  |
| C  | 0.618631  | 0.177752  | 6.170932  |
| O  | 0.340177  | 0.207858  | 7.298679  |
| C  | 0.967839  | 2.045948  | 4.214684  |
| O  | 0.941177  | 3.208917  | 4.170741  |
| S  | 1.193935  | -2.428705 | 4.572130  |
| C  | 0.443509  | -3.514117 | 3.432339  |
| O  | 0.607655  | -4.829889 | 3.686245  |
| C  | 1.350285  | -5.314465 | 4.818974  |
| S  | -0.454687 | -3.162881 | 2.063197  |
| H  | 3.229870  | -0.070874 | 2.027245  |
| H  | 3.362656  | -0.138453 | -0.452949 |
| H  | 1.215486  | -0.062242 | -1.774600 |
| H  | -0.933754 | 0.011594  | -0.547359 |
| H  | -2.650364 | 0.015041  | 0.579432  |
| H  | -4.631414 | -0.050743 | 2.063320  |
| H  | -4.273063 | -0.123522 | 4.559156  |
| H  | -1.944514 | -0.060795 | 5.423723  |
| H  | 1.294816  | -6.400796 | 4.737892  |
| H  | 2.390685  | -4.981163 | 4.775913  |
| H  | 0.898046  | -4.978079 | 5.755829  |

#### TS5-A1a-OCH<sub>3</sub>

|   |          |           |           |
|---|----------|-----------|-----------|
| C | 3.164990 | -1.766590 | -0.409213 |
| C | 1.978180 | -1.144180 | -0.002876 |
| N | 0.788080 | -1.475362 | -0.566075 |

|    |           |           |           |
|----|-----------|-----------|-----------|
| C  | 0.765496  | -2.382213 | -1.562521 |
| C  | 1.909595  | -3.020183 | -2.023768 |
| C  | 3.133447  | -2.711419 | -1.426735 |
| C  | 1.923514  | -0.112957 | 1.053900  |
| N  | 0.695127  | 0.409087  | 1.306084  |
| C  | 0.579698  | 1.392763  | 2.220314  |
| C  | 1.660373  | 1.877002  | 2.945918  |
| C  | 2.917675  | 1.311691  | 2.728021  |
| C  | 3.046595  | 0.308704  | 1.775563  |
| Re | -1.003363 | -0.456394 | 0.213496  |
| C  | -2.389661 | 0.640351  | 0.968680  |
| O  | -3.198167 | 1.333366  | 1.438251  |
| C  | -1.264533 | -1.774832 | 1.589588  |
| O  | -1.422898 | -2.571269 | 2.422559  |
| S  | -0.686749 | 1.223608  | -1.694472 |
| C  | 0.724580  | 2.349780  | -1.497335 |
| O  | 0.327592  | 3.545371  | -1.410851 |
| C  | -2.310104 | -1.334352 | -0.897686 |
| O  | -3.069357 | -1.886067 | -1.583200 |
| S  | 2.340373  | 1.844387  | -1.531882 |
| C  | -1.762287 | 3.560028  | -1.508925 |
| H  | -0.204926 | -2.595856 | -1.993396 |
| H  | 1.834154  | -3.741128 | -2.829997 |
| H  | 4.049725  | -3.190613 | -1.756530 |
| H  | 4.108475  | -1.494017 | 0.045664  |
| H  | 4.018176  | -0.124688 | 1.576614  |
| H  | 3.785893  | 1.655382  | 3.281041  |
| H  | 1.510278  | 2.675198  | 3.664030  |
| H  | -0.416026 | 1.791377  | 2.370403  |
| H  | -1.680883 | 3.889458  | -2.536341 |
| H  | -2.589336 | 2.899756  | -1.291010 |
| H  | -1.566476 | 4.307964  | -0.752678 |

#### TS4-A1b-OCH<sub>3</sub>

|    |           |           |           |
|----|-----------|-----------|-----------|
| C  | 5.244535  | 0.751715  | -1.616712 |
| O  | 3.354875  | 0.386652  | -2.429217 |
| C  | 2.648404  | 0.085594  | -1.427250 |
| S  | 3.427178  | 0.080033  | 0.105616  |
| S  | 0.954965  | -0.283683 | -1.741512 |
| Re | -0.495282 | -0.920033 | 0.272613  |
| N  | 0.026898  | 1.026488  | 1.142883  |
| C  | -0.610355 | 2.119110  | 0.642947  |
| C  | -1.631312 | 1.847404  | -0.389139 |
| N  | -1.831306 | 0.536614  | -0.689272 |
| C  | -1.746438 | -1.312403 | 1.679448  |
| O  | -2.506446 | -1.548713 | 2.530480  |
| C  | 0.833313  | -2.025191 | 1.139200  |
| O  | 1.599524  | -2.699935 | 1.689155  |
| C  | -1.070996 | -2.475085 | -0.703810 |
| O  | -1.450182 | -3.388950 | -1.314629 |
| C  | 0.947040  | 1.194148  | 2.111951  |
| C  | -2.762222 | 0.211731  | -1.607971 |
| H  | 5.465656  | 0.377683  | -2.607217 |
| H  | 5.075754  | 1.817147  | -1.534479 |
| H  | 5.823035  | 0.299604  | -0.823818 |
| C  | 1.269635  | 2.443603  | 2.633281  |
| H  | 1.430964  | 0.296155  | 2.470814  |
| H  | 2.018996  | 2.519110  | 3.413123  |
| C  | 0.627760  | 3.569362  | 2.122565  |
| C  | -0.321450 | 3.403088  | 1.116792  |
| H  | 0.857504  | 4.561180  | 2.498900  |

|   |           |           |           |
|---|-----------|-----------|-----------|
| H | -0.833404 | 4.266432  | 0.710772  |
| C | -3.533740 | 1.161598  | -2.267176 |
| H | -2.879001 | -0.845037 | -1.814846 |
| H | -4.266383 | 0.842522  | -3.000033 |
| C | -3.334063 | 2.509751  | -1.968391 |
| C | -2.375990 | 2.851686  | -1.019625 |
| H | -3.911867 | 3.282204  | -2.465814 |
| H | -2.205447 | 3.893077  | -0.777313 |

#### M4-A1b-OCH<sub>3</sub>

|    |           |           |           |
|----|-----------|-----------|-----------|
| C  | 0.944531  | 2.964838  | -2.174431 |
| C  | 0.939086  | 1.633015  | -1.773889 |
| N  | -0.057511 | 1.094976  | -1.044697 |
| C  | -1.107309 | 1.881139  | -0.684066 |
| C  | -1.156665 | 3.231156  | -1.049967 |
| C  | -0.121534 | 3.781459  | -1.800145 |
| Re | -0.092325 | -0.991275 | -0.350147 |
| S  | 0.531292  | -0.089354 | 1.972365  |
| C  | 1.984487  | 0.911446  | 2.137615  |
| S  | 3.216319  | 0.836976  | 0.805393  |
| C  | -2.182328 | 1.209610  | 0.074808  |
| N  | -2.009370 | -0.120861 | 0.290905  |
| C  | -2.957893 | -0.802784 | 0.961060  |
| C  | -4.115630 | -0.204263 | 1.445085  |
| C  | -4.301736 | 1.161393  | 1.230640  |
| C  | -3.326467 | 1.870829  | 0.537035  |
| C  | -0.821663 | -1.619458 | -2.015070 |
| O  | -1.265633 | -1.999003 | -3.022818 |
| C  | -0.326033 | -2.730814 | 0.441275  |
| O  | -0.507600 | -3.768929 | 0.930607  |
| C  | 1.662959  | -1.552019 | -0.924572 |
| O  | 2.696280  | -1.902590 | -1.320462 |
| O  | 2.181721  | 1.600909  | 3.119921  |
| C  | 4.447591  | 2.011294  | 1.468642  |
| H  | -2.768693 | -1.858312 | 1.113448  |
| H  | -4.843771 | -0.801524 | 1.982399  |
| H  | -3.452701 | 2.932432  | 0.366083  |
| H  | -5.188372 | 1.667459  | 1.598970  |
| H  | -1.995455 | 3.848951  | -0.755212 |
| H  | -0.150548 | 4.827638  | -2.087641 |
| H  | 1.753169  | 0.968716  | -2.031966 |
| H  | 1.775673  | 3.344081  | -2.758325 |
| H  | 5.264954  | 2.043694  | 0.744167  |
| H  | 4.010882  | 3.004569  | 1.586058  |
| H  | 4.819130  | 1.663041  | 2.433328  |

#### TS5-A1b-OCH<sub>3</sub>

|    |           |           |           |
|----|-----------|-----------|-----------|
| C  | 3.499090  | -1.052627 | 1.122246  |
| C  | 2.387143  | -0.451531 | 0.517545  |
| N  | 1.331789  | -1.196820 | 0.096156  |
| C  | 1.373479  | -2.534977 | 0.258408  |
| C  | 2.448691  | -3.190791 | 0.843546  |
| C  | 3.532790  | -2.432400 | 1.289292  |
| C  | 2.280915  | 1.001510  | 0.278469  |
| N  | 1.140281  | 1.410561  | -0.330444 |
| C  | 0.987297  | 2.717322  | -0.618659 |
| C  | 1.945795  | 3.673230  | -0.305415 |
| C  | 3.111347  | 3.265600  | 0.344783  |
| C  | 3.279015  | 1.916334  | 0.637160  |
| Re | -0.389105 | -0.135404 | -0.794085 |
| C  | -1.802473 | 1.021318  | -1.435534 |

|   |           |           |           |
|---|-----------|-----------|-----------|
| O | -2.619757 | 1.720659  | -1.863477 |
| C | 0.282535  | -0.298542 | -2.542619 |
| O | 0.708422  | -0.404932 | -3.625128 |
| C | -1.534562 | -1.644026 | -1.096428 |
| O | -2.190273 | -2.587505 | -1.280988 |
| S | -1.340772 | -0.970856 | 1.993848  |
| C | -2.254238 | 0.666320  | 2.290634  |
| S | -1.352029 | 1.948118  | 1.582384  |
| O | -3.286432 | 0.647092  | 2.920351  |
| C | -2.655726 | -2.201160 | 2.317814  |
| H | 0.508891  | -3.084060 | -0.093746 |
| H | 2.426928  | -4.269810 | 0.947907  |
| H | 4.330882  | -0.447887 | 1.460590  |
| H | 4.389293  | -2.906609 | 1.757764  |
| H | 4.177417  | 1.581386  | 1.140216  |
| H | 3.876520  | 3.984554  | 0.619512  |
| H | 0.056972  | 2.994993  | -1.097863 |
| H | 1.768124  | 4.712564  | -0.557713 |
| H | -2.250827 | -3.018025 | 2.918675  |
| H | -3.430468 | -1.671743 | 2.882048  |
| H | -3.072772 | -2.588462 | 1.385759  |

### TS3-A2-OCH<sub>3</sub>

|    |           |           |           |
|----|-----------|-----------|-----------|
| C  | 0.441983  | 1.095306  | -4.861148 |
| O  | 0.231165  | 0.863768  | -2.795640 |
| C  | 1.394589  | 0.523567  | -2.425260 |
| S  | 1.813306  | 0.331052  | -0.726784 |
| Re | -0.251818 | 0.773186  | 0.711351  |
| C  | 0.759363  | 2.019281  | 1.772209  |
| O  | 1.387415  | 2.737924  | 2.436996  |
| S  | 2.577890  | 0.258643  | -3.633978 |
| N  | 0.428960  | -1.067773 | 1.694330  |
| C  | 0.059235  | -2.245012 | 1.122811  |
| C  | -0.847686 | -2.136353 | -0.037658 |
| N  | -1.180956 | -0.871378 | -0.408489 |
| C  | -1.771119 | 0.978962  | 1.876602  |
| O  | -2.691478 | 1.104594  | 2.580114  |
| C  | -0.861758 | 2.249800  | -0.375532 |
| O  | -1.258155 | 3.134736  | -1.012281 |
| C  | -2.021842 | -0.695458 | -1.445811 |
| C  | 1.242739  | -1.091577 | 2.768764  |
| H  | -0.623809 | 0.958905  | -4.736370 |
| H  | 0.795769  | 2.117151  | -4.829369 |
| H  | 0.892991  | 0.458464  | -5.608954 |
| C  | -2.573278 | -1.757891 | -2.153600 |
| H  | -2.240384 | 0.329781  | -1.712288 |
| H  | -3.245986 | -1.558297 | -2.980263 |
| C  | -2.234551 | -3.059160 | -1.783915 |
| C  | -1.363386 | -3.247341 | -0.715243 |
| H  | -2.639849 | -3.913697 | -2.316405 |
| H  | -1.089444 | -4.250392 | -0.413466 |
| C  | 1.724362  | -2.271461 | 3.323335  |
| H  | 1.511368  | -0.127916 | 3.184017  |
| H  | 2.379344  | -2.229790 | 4.186442  |
| C  | 1.352437  | -3.484587 | 2.742679  |
| C  | 0.511103  | -3.467432 | 1.635197  |
| H  | 1.711828  | -4.427305 | 3.142705  |
| H  | 0.214606  | -4.398991 | 1.169847  |

### M3-A2-OCH<sub>3</sub>



|    |           |           |           |
|----|-----------|-----------|-----------|
| C  | -0.335767 | -0.082009 | -2.561132 |
| Re | 0.082733  | -0.142613 | -0.683985 |
| S  | 0.788269  | -0.133108 | 1.772721  |
| C  | -0.624974 | 0.330391  | 2.724107  |
| S  | -0.256288 | 0.342794  | 4.498808  |
| C  | -1.887347 | 0.850014  | 5.143957  |
| O  | -0.591278 | -0.046161 | -3.697334 |
| C  | -1.606730 | -1.008502 | -0.316674 |
| O  | -2.629630 | -1.518978 | -0.123971 |
| C  | 0.888848  | -1.875565 | -0.897234 |
| O  | 1.417400  | -2.902946 | -1.031955 |
| N  | 1.903130  | 1.062343  | -0.921277 |
| C  | 1.791554  | 2.400008  | -0.705285 |
| C  | 0.429517  | 2.891515  | -0.412989 |
| N  | -0.542294 | 1.942280  | -0.367553 |
| O  | -1.735344 | 0.619606  | 2.305733  |
| C  | -1.810300 | 2.316286  | -0.110669 |
| C  | 2.913022  | 3.235993  | -0.774544 |
| H  | -1.799118 | 0.847187  | 6.233169  |
| H  | -2.149455 | 1.851251  | 4.797187  |
| H  | -2.657915 | 0.143111  | 4.832351  |
| C  | -2.173192 | 3.643062  | 0.095634  |
| H  | -2.540211 | 1.520763  | -0.053247 |
| H  | -3.209572 | 3.886901  | 0.300273  |
| C  | -1.184683 | 4.624994  | 0.047518  |
| C  | 0.129123  | 4.243234  | -0.208169 |
| H  | -1.428903 | 5.670357  | 0.208032  |
| H  | 0.910174  | 4.992043  | -0.247508 |
| C  | 4.161705  | 2.696117  | -1.064357 |
| H  | 2.814140  | 4.299535  | -0.597487 |
| H  | 5.036565  | 3.336429  | -1.115158 |
| C  | 4.265494  | 1.322101  | -1.284573 |
| C  | 3.115836  | 0.545487  | -1.202324 |
| H  | 5.215549  | 0.851282  | -1.511326 |
| H  | 3.151157  | -0.525406 | -1.360794 |

### TS4-A2-OCH<sub>3</sub>

|    |           |           |           |
|----|-----------|-----------|-----------|
| C  | -0.381848 | -0.764486 | -2.661702 |
| O  | -0.546821 | -0.773331 | -3.814486 |
| Re | -0.114879 | -0.756293 | -0.753400 |
| C  | -1.849889 | -1.561102 | -0.478819 |
| O  | -2.897386 | -2.036110 | -0.329819 |
| C  | 0.654565  | -2.516404 | -0.829569 |
| O  | 1.161375  | -3.562773 | -0.877055 |
| N  | 1.755464  | 0.386598  | -0.878932 |
| C  | 1.667395  | 1.734234  | -0.719048 |
| C  | 0.301704  | 2.274601  | -0.562773 |
| N  | -0.700837 | 1.356065  | -0.573336 |
| S  | 0.382194  | -0.663467 | 1.752135  |
| C  | -1.051001 | -0.057954 | 2.566107  |
| O  | -2.102284 | 0.276028  | 2.056700  |
| S  | -0.830406 | 0.072646  | 4.417291  |
| C  | -1.337059 | -1.637672 | 4.849498  |
| C  | -1.974064 | 1.777229  | -0.446683 |
| C  | 2.971577  | -0.173114 | -1.039589 |
| H  | -1.265536 | -1.713163 | 5.937340  |
| H  | -2.368330 | -1.827081 | 4.543674  |
| H  | -0.663834 | -2.366142 | 4.392375  |
| C  | -2.310104 | 3.120281  | -0.314385 |
| H  | -2.733614 | 1.007897  | -0.434327 |
| H  | -3.351850 | 3.401403  | -0.209601 |

|   |           |           |           |
|---|-----------|-----------|-----------|
| C | -1.289565 | 4.069783  | -0.301311 |
| C | 0.028483  | 3.640677  | -0.427260 |
| H | -1.512654 | 5.126390  | -0.192307 |
| H | 0.833979  | 4.364127  | -0.418726 |
| C | 4.146981  | 0.568020  | -1.050545 |
| H | 2.988327  | -1.249471 | -1.159540 |
| H | 5.097690  | 0.063373  | -1.181654 |
| C | 4.067391  | 1.951447  | -0.885327 |
| C | 2.816067  | 2.535561  | -0.720064 |
| H | 4.962641  | 2.565002  | -0.883435 |
| H | 2.735273  | 3.607047  | -0.587603 |

#### M4-A2-OCH<sub>3</sub>

|    |           |           |           |
|----|-----------|-----------|-----------|
| C  | -0.559931 | -0.553222 | -2.686618 |
| Re | -0.180665 | -0.723457 | -0.808161 |
| S  | 0.460847  | -0.871722 | 1.664549  |
| C  | -0.984560 | -0.444932 | 2.588657  |
| S  | -0.869532 | -0.461700 | 4.396828  |
| C  | 0.822922  | -1.026900 | 4.793226  |
| O  | -0.791920 | -0.452354 | -3.823772 |
| C  | -1.866378 | -1.631622 | -0.529539 |
| O  | -2.883760 | -2.168360 | -0.390241 |
| C  | 0.652833  | -2.428727 | -1.109764 |
| O  | 1.198846  | -3.439468 | -1.295001 |
| N  | 1.628187  | 0.513194  | -0.933230 |
| C  | 1.495089  | 1.834661  | -0.641622 |
| C  | 0.122282  | 2.292251  | -0.344990 |
| N  | -0.839656 | 1.332492  | -0.381361 |
| O  | -2.070309 | -0.126556 | 2.127456  |
| C  | -2.117399 | 1.677925  | -0.132655 |
| C  | 2.852091  | 0.030007  | -1.227636 |
| H  | 0.869188  | -1.058916 | 5.885511  |
| H  | 1.009150  | -2.024394 | 4.392249  |
| H  | 1.574515  | -0.330569 | 4.417822  |
| C  | -2.498481 | 2.985378  | 0.151091  |
| H  | -2.841001 | 0.874948  | -0.143909 |
| H  | -3.541347 | 3.205567  | 0.349011  |
| C  | -1.519580 | 3.976711  | 0.191714  |
| C  | -0.196447 | 3.624771  | -0.059082 |
| H  | -1.778033 | 5.006521  | 0.417224  |
| H  | 0.577339  | 4.381600  | -0.030931 |
| C  | 3.991665  | 0.825013  | -1.248209 |
| H  | 2.905565  | -1.028638 | -1.450759 |
| H  | 4.950616  | 0.381098  | -1.491339 |
| C  | 3.865977  | 2.182284  | -0.949059 |
| C  | 2.606252  | 2.687568  | -0.645390 |
| H  | 4.732294  | 2.836119  | -0.951529 |
| H  | 2.490003  | 3.737807  | -0.409435 |

#### TS5-A2-OCH<sub>3</sub>

|   |           |           |           |
|---|-----------|-----------|-----------|
| C | 1.402185  | 3.409190  | -0.144067 |
| C | 0.837265  | 2.173611  | 0.189703  |
| N | -0.293823 | 1.734971  | -0.419527 |
| C | -0.858070 | 2.495083  | -1.377488 |
| C | -0.341873 | 3.727198  | -1.760170 |
| C | 0.810107  | 4.194580  | -1.126685 |
| C | 1.424277  | 1.258032  | 1.188456  |
| N | 0.779191  | 0.074062  | 1.353674  |
| C | 1.290768  | -0.834351 | 2.207239  |
| C | 2.444707  | -0.605788 | 2.946916  |

|    |           |           |           |
|----|-----------|-----------|-----------|
| C  | 3.098536  | 0.618016  | 2.803342  |
| C  | 2.581111  | 1.555512  | 1.916339  |
| Re | -1.085419 | -0.221385 | 0.220320  |
| C  | -2.632199 | -0.272596 | -0.925291 |
| O  | -3.555512 | -0.266835 | -1.631445 |
| C  | -2.126297 | 0.583494  | 1.627445  |
| O  | -2.756391 | 1.073384  | 2.474179  |
| S  | 0.262096  | -1.230393 | -1.697875 |
| C  | 2.063203  | -0.834820 | -1.570841 |
| S  | 3.034771  | -2.214282 | -1.977527 |
| C  | -1.516322 | -1.977592 | 0.874856  |
| O  | -1.737612 | -3.041189 | 1.292081  |
| O  | 2.441403  | 0.289986  | -1.277454 |
| H  | 0.748927  | -1.768238 | 2.292664  |
| H  | 2.815246  | -1.375498 | 3.614532  |
| H  | 4.001836  | 0.835653  | 3.364151  |
| H  | 3.085934  | 2.502863  | 1.778141  |
| H  | -1.748145 | 2.092356  | -1.844976 |
| H  | -0.835783 | 4.297476  | -2.538907 |
| H  | 1.246057  | 5.150459  | -1.399167 |
| H  | 2.309019  | 3.745561  | 0.341673  |
| C  | 0.872531  | -3.678901 | -1.966888 |
| H  | 0.959278  | -3.750297 | -3.042808 |
| H  | 1.578522  | -4.263142 | -1.394784 |
| H  | -0.136600 | -3.718554 | -1.583208 |

### TS2-B-OCH<sub>3</sub>

|    |           |           |           |
|----|-----------|-----------|-----------|
| C  | 0.046909  | -0.309176 | 3.280242  |
| O  | 0.799778  | 0.146121  | 1.444575  |
| C  | 1.744130  | 1.077986  | 1.658921  |
| S  | 1.666077  | 1.690251  | 3.253796  |
| Re | 0.206017  | -0.938069 | -0.380763 |
| N  | -0.050393 | 1.069315  | -1.260548 |
| C  | -1.144097 | 1.774484  | -0.877276 |
| C  | -2.113763 | 1.040069  | -0.037575 |
| N  | -1.787534 | -0.246667 | 0.256199  |
| C  | 2.013578  | -1.317664 | -0.981983 |
| O  | 3.052145  | -1.605037 | -1.404324 |
| C  | 0.206181  | -2.627123 | 0.529980  |
| O  | 0.157061  | -3.652865 | 1.080345  |
| C  | -0.472650 | -1.799792 | -1.943133 |
| O  | -0.897024 | -2.313386 | -2.899085 |
| S  | 2.846122  | 1.518801  | 0.458741  |
| C  | -2.665104 | -1.000902 | 0.948598  |
| C  | 0.845410  | 1.645465  | -2.083903 |
| H  | -0.640250 | 0.412675  | 3.700329  |
| H  | 0.797777  | -0.693006 | 3.957213  |
| H  | -0.412854 | -1.062699 | 2.655068  |
| C  | -3.885093 | -0.514499 | 1.402189  |
| H  | -2.365868 | -2.025063 | 1.138586  |
| H  | -4.551562 | -1.166375 | 1.955923  |
| C  | -4.215385 | 0.814772  | 1.132094  |
| C  | -3.323978 | 1.592913  | 0.401348  |
| H  | -5.154270 | 1.236300  | 1.476844  |
| H  | -3.569957 | 2.621576  | 0.170401  |
| C  | 0.689071  | 2.940001  | -2.571913 |
| H  | 1.703934  | 1.045655  | -2.351435 |
| H  | 1.436961  | 3.353676  | -3.238632 |
| C  | -0.413013 | 3.683259  | -2.156377 |
| C  | -1.339565 | 3.094679  | -1.299214 |
| H  | -0.553540 | 4.705545  | -2.492914 |

|                                                 |           |           |           |
|-------------------------------------------------|-----------|-----------|-----------|
| H                                               | -2.202834 | 3.657975  | -0.968376 |
| [Re(SCH <sub>3</sub> )(CO) <sub>3</sub> (bipy)] |           |           |           |
| C                                               | 0.000000  | 0.000000  | 0.000000  |
| C                                               | 0.000000  | 0.000000  | 1.400953  |
| N                                               | 1.163603  | 0.000000  | 2.102440  |
| C                                               | 2.329896  | 0.015853  | 1.428217  |
| C                                               | 2.397545  | 0.016685  | 0.040206  |
| C                                               | 1.207583  | 0.006720  | -0.689442 |
| C                                               | -1.232450 | 0.002791  | 2.213911  |
| C                                               | -2.520304 | 0.006297  | 1.662463  |
| C                                               | -3.629377 | 0.018079  | 2.501185  |
| C                                               | -3.427004 | 0.029559  | 3.882274  |
| C                                               | -2.124432 | 0.025307  | 4.366452  |
| N                                               | -1.045612 | 0.004471  | 3.559712  |
| Re                                              | 1.029485  | 0.062609  | 4.302151  |
| C                                               | 0.641600  | 0.251214  | 6.172089  |
| O                                               | 0.360022  | 0.378578  | 7.294905  |
| C                                               | 1.138695  | -1.859015 | 4.472280  |
| O                                               | 1.212414  | -3.017691 | 4.586962  |
| C                                               | 2.901686  | 0.247297  | 4.680558  |
| O                                               | 4.045148  | 0.372117  | 4.862788  |
| S                                               | 0.774537  | 2.543640  | 3.913444  |
| C                                               | 1.665544  | 3.446528  | 5.245657  |
| H                                               | 1.540309  | 4.516633  | 5.057682  |
| H                                               | 1.253031  | 3.216721  | 6.231662  |
| H                                               | 2.734206  | 3.216076  | 5.241532  |
| H                                               | 3.228595  | 0.029534  | 2.032129  |
| H                                               | 3.365064  | 0.029199  | -0.449274 |
| H                                               | -0.933986 | -0.000281 | -0.547966 |
| H                                               | 1.218979  | 0.008578  | -1.774742 |
| H                                               | -1.922964 | 0.040239  | 5.430280  |
| H                                               | -4.257753 | 0.045930  | 4.579000  |
| H                                               | -4.631537 | 0.022672  | 2.084458  |
| H                                               | -2.656401 | 0.004943  | 0.588187  |

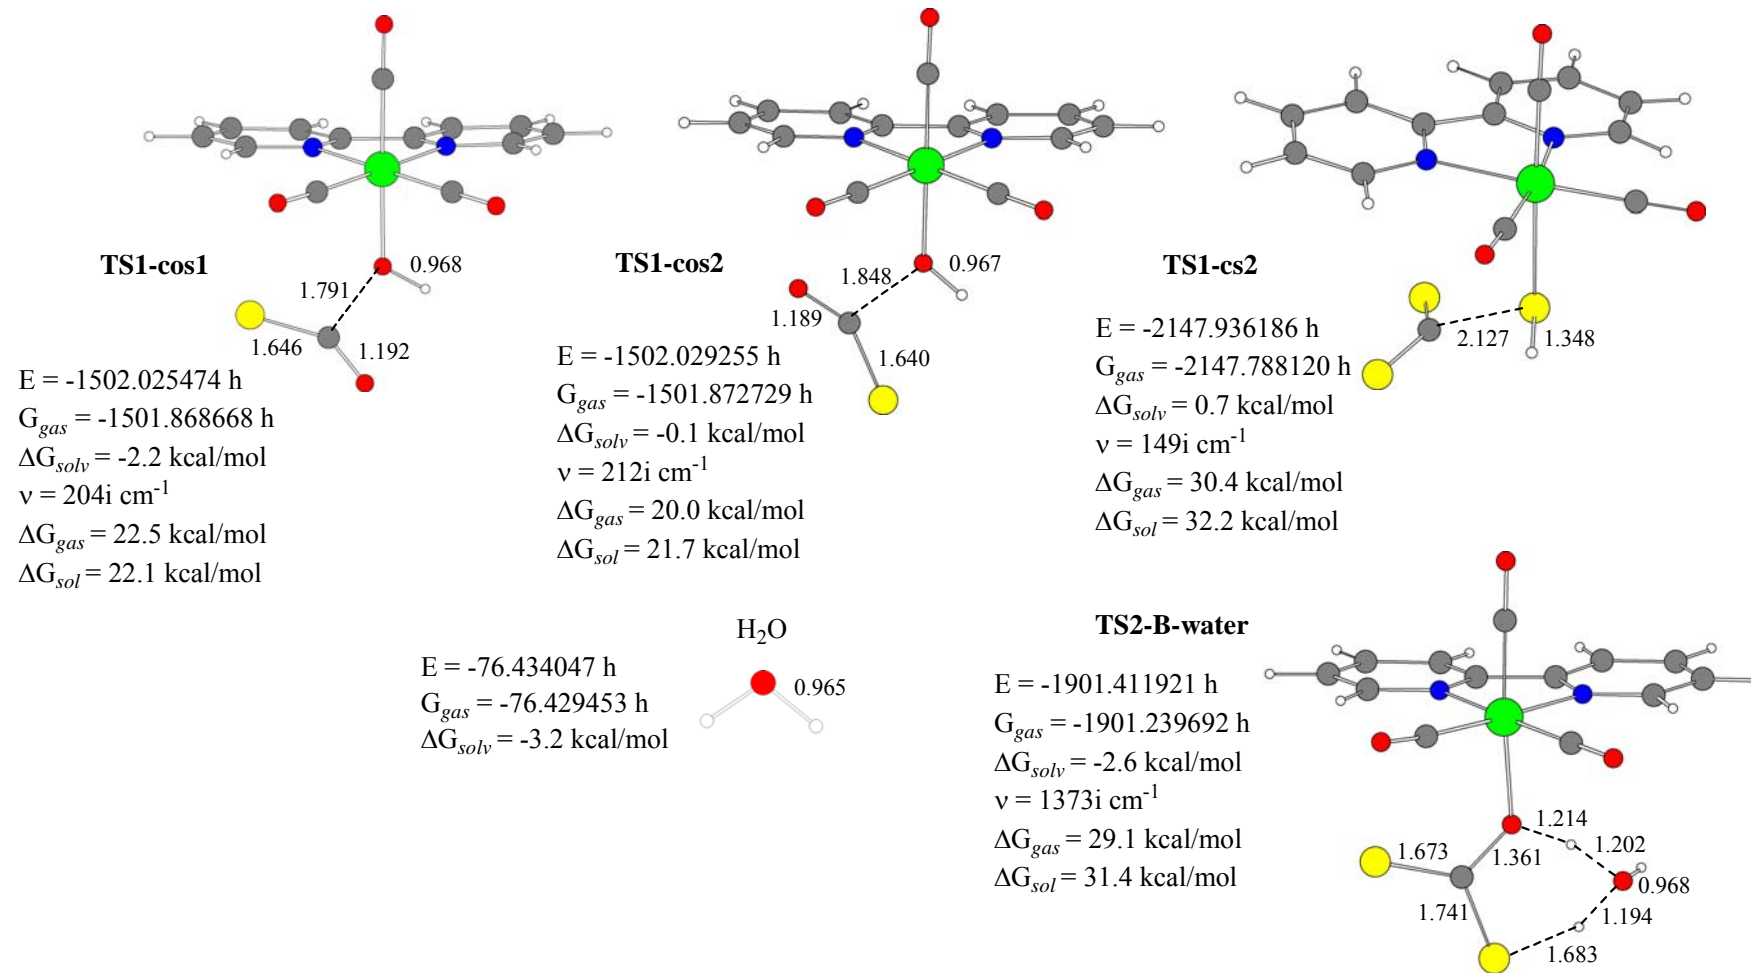

**Figure 1S.** B3LYP/6-31+G(d,p) (LANL2DZ + *f* for Re) optimized structures of the transition states analogous to **TS1** for the reaction of [Re(OH)(CO)<sub>3</sub>(bipy)] toward COS (**TS1-cos1** and **TS1-cos2**) and CS<sub>2</sub> (**TS1-cs2**), of a water molecule, and of the transition state analogous to **TS2-B** with an additional water molecule (**TS2-B-water**), which assists the hydrogen migration. Most significant distances (in angstroms) and energy data are also displayed.

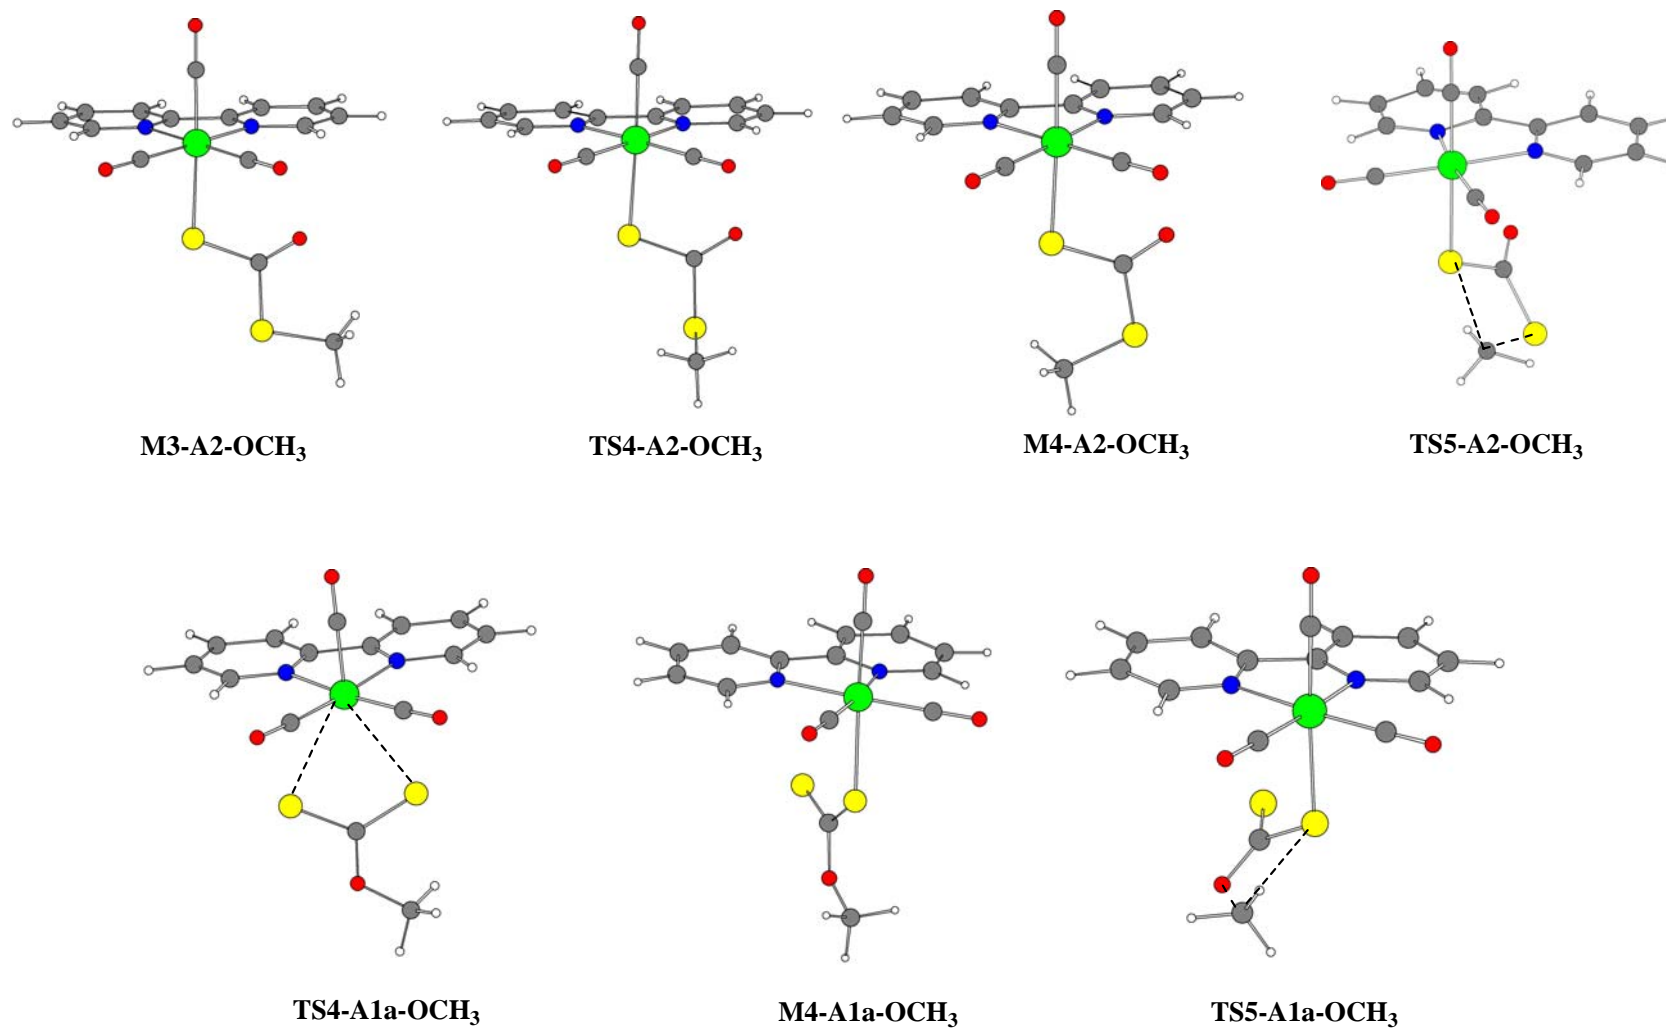

**Figure 1S.** B3LYP/6-31+G(d,p) (LANL2DZ + *f* for Re) optimized structures of the species, which are not shown in Figure 3, for the reaction of [Re(OCH<sub>3</sub>)(CO)<sub>3</sub>(bipy)] toward CS<sub>2</sub>.

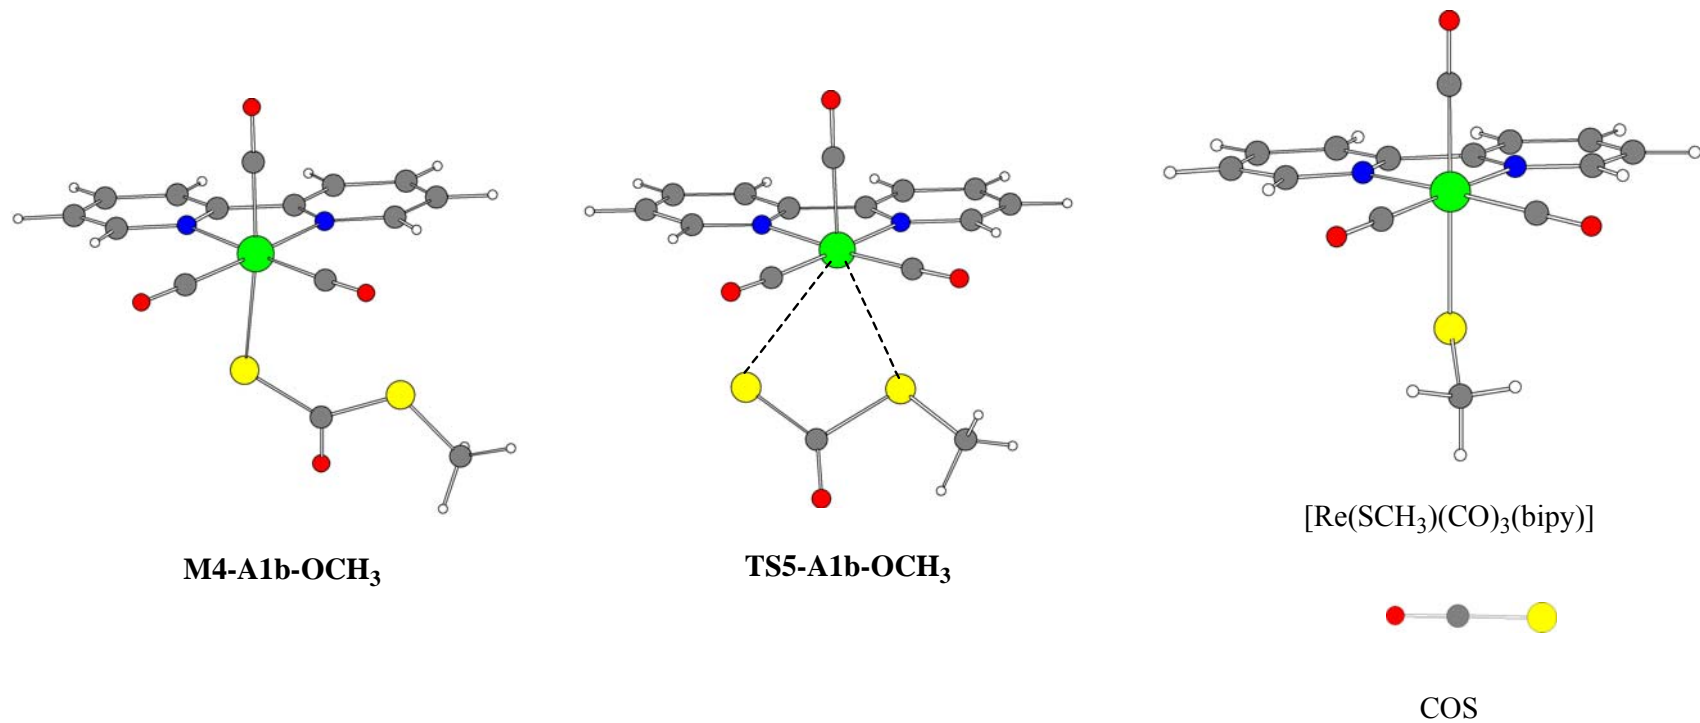

Figure 1S. (Cont.)
